# Supplementary material
Source: PubMed Central journal article supplement (PMC5816162)
Supplement: pnas.1714645115.sapp.pdf [file pnas.1714645115.sapp.pdf]

1 **SI Appendix**

2 **Text S1** Glutamate restores susceptibility of drug-resistant *E. tarda* to kanamycin.

3 **Text S2** Mass isotopomer analysis for  $^{13}\text{C}$  labeled glutamate detected in a nontargeted  
4 manner.

5 **Text S3** Pharmacologic inhibition of enzyme catalysis is a widely accepted.

6

7 **SI Materials and methods**

8

9 **Fig. S1** Glutamate restores susceptibility of drug-resistant *E. tarda* to kanamycin.

10 **Fig. S2** Glutamate restores susceptibility to kanamycin and regulates NADH, PMF  
11 and cellular kanamycin.

12 **Fig. S3** Lactate measurement.

13 **Fig. S4** Effect of inhibitors on the P cycle.

14 **Fig. S5** Mass isotopomer analysis for  $^{13}\text{C}$  labeled glutamate detected in a nontargeted  
15 manner in *E. coli* K12 cultured in different culture conditions.

16 **Fig. S6** Percent survival of rescued strains and oleate-enabled killing of *E. coli* K12  
17 by gentamicin.

18

19 **Table S1.** Summary of all compounds being detected as labeled by the  $[\text{U-}^{13}\text{C}]$   
20 labeled L-glutamate in *E. tarda* EIB202, which were cultured in LB medium and then  
21 incubated in M9 plus acetate with the labeled glutamate

22 **Table S2.** Non-targeted detection of  $[\text{U-}^{13}\text{C}]$  labeled L-glutamate in *E. tarda* EIB202,

23 which were cultured in LB medium and then incubated in M9 plus acetate with the  
24 labeled glutamate

25 **Table S3.** Non-targeted detection of [U-<sup>13</sup>C] labeled L-glutamate in *E. coli* K12  
26 BW25113, which were cultured in LB medium and then in M9 medium plus acetate  
27 with the labeled glutamate.

28 **Table S4.** Non-targeted detection of [U-<sup>13</sup>C] labeled L-glutamate in *E. coli* K12  
29 BW25113, which were cultured in M9 medium with acetate plus 0.3% glucose and  
30 then incubated in M9 medium plus acetate with the labeled glutamate.

31 **Table S5.** Non-targeted detection of [U-<sup>13</sup>C] labeled L-glutamate in *E. coli* K12  
32 BW25113, which were cultured in SOC medium and then incubated in M9 medium  
33 plus acetate with the labeled glutamate.

34 **Table S6.** Non-targeted detection of [U-<sup>13</sup>C] labeled L-glutamate at 2 h in *E. coli* K12  
35 BW25113, which were cultured in LB medium and then incubated in M9 medium  
36 plus acetate with the labeled glutamate

37 **Table S7.** Non-targeted detection of [U-<sup>13</sup>C] labeled L-glutamate at 4h in *E. coli* K12  
38 BW25113, which were cultured in LB medium and then incubated in M9 medium  
39 plus acetate with the labeled glutamate.

40 **Table S8.** Non-targeted detection of [U-<sup>13</sup>C] labeled L-glucose in *E. coli* K12  
41 BW25113, which were cultured in LB medium and then incubated in M9 medium  
42 plus acetate with the labeled glucose.

43 **Table S9.** Primers used for qPCR.

44 **Table S10.** Primers used for gene complementation.

45 **Text S1**, Glutamate restores susceptibility of drug-resistant *E. tarda* to kanamycin.

46 In our previous study, we showed depressed glutamate as alanine and glucose did in *E.*

47 *tarda* LTB4-R (lab-generated kanamycin-resistant strain) and EIB202 (isolated

48 multidrug-resistant strain from dead fish) (**SI Appendix Fig. S1A**) (1). Alanine and

49 glutamate are in the same pathway alanine, aspartate and glutamate metabolism,

50 which are reversibly converted to pyruvic acid and  $\alpha$ -ketoglutarate, respectively, by

51 glutamic-pyruvic transaminase (GPT) and feed the TCA cycle (**SI Appendix Fig.**

52 **S1B**). To investigate the adjunct effect of glutamate on kanamycin, viability of *E.*

53 *tarda* LTB4-R and EIB202 was assessed in the presence of different incubation

54 periods, kanamycin concentrations and glutamate concentrations. The viability of

55 LTB4-R and EIB202 decreased over time (**SI Appendix Fig. S1C**), and in a

56 kanamycin dose-dependent manner (**SI Appendix Fig. S1D**). An approximate

57 2,000-fold decrease in viability was observed for LTB4-R and EIB202 in the presence

58 of 1,000 and 50  $\mu\text{g}/\text{mL}$  kanamycin, respectively (**SI Appendix Fig. S1D**). The

59 viability of LTB4-R and EIB202 was decreased with increasing glutamate, when

60 approximate 120-fold and 600-fold decreased were detected in viability under the

61 synergistic effect of 2.5 glutamate and 500  $\mu\text{g}/\text{mL}$  and 30  $\mu\text{g}/\text{mL}$  kanamycin for 6 h,

62 respectively, but was unaffected if glutamate or kanamycin was present individually

63 (**SI Appendix Fig. S1E**).

64

65 Reprogramming the energy flow in antibiotic-resistant bacteria is an important

66 mechanism by which alanine could increase the antibiotic uptake through increased

67 PMF (1). However, in this aspect a similar mechanism for glutamate is still relatively  
68 explored. Concentration of NADH and PMF was quantified in EIB202 in the presence  
69 or absence of glutamate. In addition, PMF was detected in the presence or absence of  
70 carbonyl cyanide m-chlorophenyl hydrazone (CCCP), an inhibitor of PMF. Results  
71 showed that glutamate promoted NADH production and PMF generation (SI  
72 Appendix Figs. S1F and S1G), and CCCP blocked PMF generation (SI Appendix  
73 S1G). Glutamate promoted kanamycin uptake, but abrogated by CCCP (SI Appendix  
74 Fig. S1H). Consistently, cell viability was reduced under the synergistic effect of  
75 glutamate plus kanamycin, which was inhibited by CCCP (SI Appendix S1I).

76  
77 Western blot analysis showed that glutamate stimulates expression of NuoI and NuoF  
78 and promotes activity of respiratory chain dehydrogenase in a dose-dependent manner  
79 (SI Appendix Fig. S2A), which was consistent with PMF measurements and enzyme  
80 activity under comparable conditions (SI Appendix Figs. S2B and S2C). When  
81 respiration was blocked with rotenone, antimycin A or  $\text{NaN}_3$ , the effect of glutamate  
82 plus kanamycin on PMF and cell viability was abrogated (SI Appendix Figs. S2D  
83 and S2E). The effect of glutamate plus kanamycin on cell viability is pH-dependent  
84 (SI Appendix Fig. S2F). The PMF promoted by glutamate is not observed under  
85 anaerobic conditions (SI Appendix Fig. S2G). Malonate, a competitive inhibitor of  
86 the enzyme succinate dehydrogenase, downregulated NADH and PMF (SI Appendix  
87 Fig. S2H), abrogating the effect of glutamate on viability of EIB202 (SI Appendix  
88 Fig. S2I), and concurrent intracellular drug concentrations decreased, while cell

89 viability increased, consistent with these results (**SI Appendix Fig. S2J**). OD value of  
90 antibiotic-sensitive LTB4-S and antibiotic-resistant LTB4-R was higher in M9  
91 medium with or without acetate and glucose, and then glutamate with or without  
92 acetate than in M9 medium with or without acetate (**SI Appendix Fig. S2K**).  
93 However, these different culture conditions didn't impact their minimum inhibitory  
94 concentration (MIC). When kanamycin is added to nongrowing cells, glutamate or  
95 glucose or plus acetate elevated kanamycin-induced killing of EIB202 by  
96 approximately 2 folds, compared with or without acetate (**SI Appendix Fig. S2L**).  
97 Glutamate could potentiate other antibiotics including gentamicin, ampicillin,  
98 rifampicin and erythromycin to kill EIB202 (**SI Appendix Fig. S2M**). Among them,  
99 gentamicin and erythromycin targets are protein synthesis (the two drugs belong to  
100 aminoglycosides and macrolides, and target at 30S rRNA and 50S rRNA,  
101 respectively), while ampicillin and rifampicin targets are the cell wall and the RNA  
102 polymerase, respectively. These results indicate that glutamate has the potential in  
103 promoting different antibiotics with differential work mechanisms.

104

105 Thus, glutamate increased intracellular NADH concentration and PMF, promoted  
106 kanamycin uptake, which likely contribute to the killing of kanamycin-resistant  
107 bacteria. Compared to our previously reported efficacy of alanine (1), glutamate  
108 generated somewhat higher NADH and PMF compared to alanine (**SI Appendix Figs.**  
109 **S2N**). Correspondingly, the viability of EIB202 was lower in the presence of  
110 glutamate than in the presence of alanine or aspartate, another depressed metabolite in

111 alanine, aspartate and glutamate metabolism, and was no significant difference with  
112 glucose plus kanamycin (SI Appendix Fig. S2O). These results suggest the effect of  
113 metabolic difference on the action between glutamate and alanine.

114 **Text S2.** Mass isotopomer analysis for  $^{13}\text{C}$  labeled glutamate detected in a  
115 nontargeted manner.

116 Three potential cycles/pathways were identified. In the first cycle,  $^{13}\text{C}_5$ -glutamate  
117 entered the TCA cycle via  $\alpha$ -ketoglutarate to produce M4-labeled succinate, fumarate,  
118 and malate, oxaloacetate, and then citrate. The low abundance of M4-labeled citrate  
119 indicated the transformation of M4-labeled oxaloacetate with unlabeled acetyl-CoA  
120 (AcCoA) to citrate was limited by the TCA cycle. The data indicate a high  $^{13}\text{C}$ -  
121 response from M4-oxaloacetate in alanine, glycine, threonine, pyruvate and fatty  
122 acids. It is possible that  $^{13}\text{C}$ -alanine, -glycine and -threonine may be transferred to  
123 phosphoenolpyruvate (PEP) and then pyruvate, but  $^{13}\text{C}$ -pyruvate and -fatty acids are  
124 not irreversibly converted to PEP (<http://www.genome.jp/kegg>). Thus, the labeled  
125 alanine, glycine and threonine should be coming from  $^{13}\text{C}$ -oxaloacetate through  
126  $^{13}\text{C}$ -PEP rather than  $^{13}\text{C}$ -pyruvate. We further deduced that M2-labeled AcCoA was  
127 generated from M3-labeled pyruvate, which was converted from M3-labeled PEP and  
128 subsequently processed to M2-labeled citrate, with unlabeled oxaloacetate present  
129 downstream from the TCA cycle due to limited flux through the TCA cycle, which is  
130 supported by a relatively low amount of M6-labeled citrate. It should be noted that if  
131 M4-labeled oxaloacetate was utilized in the transformation, significantly more  
132 M6-labeled citrate would be expected. In the second cycle, M2-labeled oxaloacetate

133 from M2-labeled citrate generated M2-labeled pyruvate and M1-labeled AcCoA, by  
134 oxidative decarboxylation of pyruvate to AcCoA, with subsequent generation of  
135 M1-labeled citrate. In the third cycle, M1-labeled oxaloacetate from M1-labeled  
136 citrate generated M1-labeled pyruvate, as well as unlabeled AcCoA and citrate, since  
137 the pathway also involved oxidative decarboxylation of pyruvate to AcCoA. The M3  
138 label may have also been generated from M2-labeled oxaloacetate and M1-labeled  
139 AcCoA or M1-labeled oxaloacetate and M2-labeled AcCoA via the TCA cycle.  
140 However, less M3 label was detected than M1 or M2 label due to limited flux through  
141 the TCA cycle. Meanwhile, M2-labeled glycine from M4 labeled oxaloacetate was  
142 transformed to M2-labeled serine and then M2-labeled pyruvate, contributing to the  
143 higher abundance of M2-labeled pyruvate. The M2-labeled pyruvate generated  
144 M1-labeled AcCoA through oxidative decarboxylation, generating more M1 label  
145 than M2 label. Equal amounts of M4, M2, and M1/M2 were required to generate M2,  
146 M1, and M3 compounds, respectively. As shown in **Fig. 1B**, the ratio of each pool (i.e.  
147  $M1 + M2 + M3) / (M1 + M2 + M4 + M2 \text{ from glycine})$  represents relative flux for  
148 that metabolite in the TCA cycle plus the OAA-PEP-Pyr-AcCoA-citrate pathway  
149 ( $v_{\text{TCA-PLUS}}/v_{\text{GLUTAMATE}}$ ), where  $v_{\text{TCA-PLUS}}$  refers to the turnover of a particular  
150 metabolite pool and  $v_{\text{GLUTAMATE}}$  refer to the flux of glutamate carbon atoms to the  
151 cycle (**Fig. 1B**).

152

153 **Text S3** Pharmacologic inhibition of enzyme catalysis is a widely accepted.

154 Pharmacologic inhibition of enzyme catalysis is a widely accepted approach (2), and

155 the inhibitors used in the present study are well characterized (1, 3-7). In microbes,  
156 malonate showed high specificity for succinate dehydrogenase (3, 5) and  
157 Bromopyruvate and furfural are more specific than Na<sub>2</sub>-ATP in target proteins.  
158 Bromopyruvate acts initially as a competitive inhibitor with pyruvate ( $K_i = 90 \mu\text{M}$ )  
159 but then proceeds to react irreversibly with the enzyme. Bromopyruvate also inhibits  
160 dihydrodipicolinate synthase (DHDPS), which catalyzes the condensation of pyruvate  
161 and aspartate beta-semialdehyde, with a  $K_i$  of 1600  $\mu\text{M}$ , indicating 18-fold inhibitory  
162 decreases in PDH efficacy (4). Furfural is an inhibitor of PDH, alcohol dehydrogenase  
163 (ADH), and aldehyde dehydrogenase (AIDH), although there is no AIDH in *E. tarda*  
164 EIB202. Furfural decreases the activity of PDH by more than 90%, whereas ADH  
165 activity decreased by less than 20% at the same concentration. Furfural inhibits ADH  
166 competitively and PDH non-competitively (7), while Na<sub>2</sub>-ATP is an inhibitor of PCK,  
167 citrate synthase, isocitrate dehydrogenase, and  $\alpha$ -oxoglutarate dehydrogenase. These  
168 data indicate that bromopyruvate and furfural show the strongest inhibition of PDH.  
169 More importantly, effects of these inhibitors can be confirmed using a genetic  
170 approach (i.e. comparison between a gene-specific mutant and an isogenic wild type  
171 control). The inhibition of the conversion from pyruvate to AcCoA completely  
172 abolished the glutamate-triggered killing effects, implying the critical role of the  
173 alternative three steps and their effect on the TCA cycle.

174

## 175 **SI Materials and methods**

### 176 **Bacterial strains and culture conditions.**



177 The bacterial strains used in this study included *E. coli* K12 BW25113 and its  
178 gene-deleted mutants, which was obtained from NBRP (NIG, Japan), and seven other  
179 pathogens *E. coli*, *Vibrio anguillanum*, *V. alginolyticus*, *V. parahaemolyticus*, *V*  
180 *vulnificus*, *V. fluvialis* and *Klebsiella pneumonia* from the collections of our laboratory.

181 Bacterial culture conditions were essentially carried out as previously described (1, 8).

182 Unless otherwise noted, frozen glycerol stocks were used to inoculate Luria-Bertani  
183 broth (LB) medium, supplemented with 50 µg/mL kanamycin for mutants, at 30 °C  
184 (*Vibrio* species) or 37 °C (*E. coli* and *K. pneumonia*) overnight. The cultures were  
185 diluted to 1:100 using fresh LB medium, or M9 medium (Na<sub>2</sub>HPO<sub>4</sub> 47.7 mM,  
186 KH<sub>2</sub>PO<sub>4</sub> 22 mM, NH<sub>4</sub>Cl 18.7 mM, NaCl 8.6 mM, MgSO<sub>4</sub> 2 mM, CaCl<sub>2</sub> 0.1 mM) with  
187 10 mM acetate plus 0.3% glucose or SOC medium and incubated overnight (24 h for  
188 *E. tarda* and 14 h for the others) at 200 r.p.m. and 80% humidity in 250 mL flasks or  
189 20 mL tubes. Bacterial cells were collected by centrifugation at 8,000 g for 5 min in 4  
190 °C. Followed by washing three times using sterile saline solution, bacterial cells were  
191 suspended in M9 medium with 10 mM acetate to arrive at 10<sup>8</sup> cells (*E. tarda*) or 5  
192 ×10<sup>8</sup> (the others) or plus desired metabolites (or labeled) or/and antibiotics and  
193 cultured for 6 h (or 2h, or 4h for some isotope tracer experiments) in the same culture  
194 conditions. Harvested cells were used for GC-MS, plate counting and biochemical  
195 analysis.

196

197 **GC-MS.**

198 GC-MS analysis was carried out with a variation on the two-stage technique, the

199 resulting data were proceeded using pattern recognition methods, and the data matrix  
200 was normalized using internal control and the total peak area each strain as described  
201 previously (9, 10). Briefly, initial peak and mass spectral deconvolution were detected  
202 using MSD ChemStation (version EA. 02.02). Identification of metabolites was  
203 performed by the National Institute of Standards and Technology (NIST) library and  
204 NIST MS search 2.0 program. Using ribitol as the internal standard allowed  
205 normalization of the metabolites data. In the dataset the resulting normalized peak  
206 intensities formed a single matrix with Rt-m/z pairs for each file. This output file was  
207 used for further analysis.

208

#### 209 **Antibiotic bactericidal assays.**

210 Antibiotic bactericidal assays were carried out as previously described (1, 8).  
211 Bacterial cells were collected as described above and suspended in M9 medium with  
212 10 mM acetate, and in the presence or absence of 2.5 mM glutamate plus 30 and 500  
213 µg/mL kanamycin for EIB202 and LTB4-R at 30 °C, respectively, and plus 1.2 µg/mL  
214 gentamicin for *E. coli* (*E. coli* K12 BW25113 gene-deleted mutants with kanamycin  
215 resistance) at 37 °C for 6 h. Otherwise, the desired antibiotic was indicated in the  
216 context. Percent survival was performed by serially diluted and spot-plated onto LB  
217 agar plates to determine colony-forming units (CFU) per mL and survival. Percentage  
218 of survival was determined by dividing the CFU obtained from a treated sample by  
219 the CFU obtained from control.

220

221 **Isotope tracer.**

222 The effects of  $^{13}\text{C}_5$ -labeled glutamate tracers on flux estimation precision were  
223 investigated as previously described (11, 12). In brief, EIB202 or *E. coli* K12 cells  
224 were harvested in LB medium, or in M9 medium with 10 mM acetate plus 0.3%  
225 glucose or in SOC medium, and then suspended in M9 medium with 10 mM acetate at  
226 6 h, or harvested in LB medium and then in M9 medium with 10 mM acetate at 2 h or  
227 4 h using 2.5 mM unlabeled compound glutamate or 1.25 mM [ $\text{U-}^{13}\text{C}_5$ ] and 1.25 mM  
228 unlabeled substrate as control and test groups, respectively. When 10 mM unlabeled  
229 compound glucose or 5 mM [ $\text{U-}^{13}\text{C}_6$ ] and 5 mM unlabeled substrate were used, *E. coli*  
230 K12 cells were harvested in LB medium and then suspended in M9 medium with 10  
231 mM acetate at 6 h. Three biological replicates were performed each growth condition.  
232 GC-MS was performed using an Agilent 7890A GC equipped with a 30 m DB-35MS  
233 capillary column connected to an Agilent 5975C MS operating under electron impact  
234 (EI) ionization. The effectiveness of each tracer was gauged using the software  
235 downloaded from Internet (13). The software provides the mass isotopomer  
236 distributions (MID) data of all labeled compounds detected in the GC-MS data.  
237 Labeled compounds were identified from the MID data, which were used for  
238 estimation of metabolic fluxes. The estimation was carried out by the tracing of  
239 labeled atoms present in an externally supplied compound as it is metabolized. Both  
240 the spectrum obtained from the labeled chromatogram and the spectrum obtained  
241 from the unlabeled chromatogram was normalized by their total signal.

242

243 **Ultra-performance liquid chromatography-MS/MS (UPLC-MS/MS).**

244 Quantification of certain metabolite in bacteria by UPLC-MS/MS was carried out as  
245 previously described (14, 15). 10 mL bacteria suspension ( $OD_{600}=0.6$ ) was collected,  
246 washed three times with 0.85% saline solution, and re-suspended in 1 mL of 50%  
247 acetonitrile (ACN). The bacteria were lysed with sonication. After centrifugation,  
248 supernatants were collected for UPLC-MS/MS analysis. UPLC was performed in  
249 Waters ACQUITY UPLC system equipped with an Acquity BEH  $C_{18}$  column (50 mm  
250  $\times$  2.1 mm i.d., 1.7  $\mu$ m; Waters Corp.). Metabolites were separated by linear gradient  
251 elution with mobile phase A (ACN) and B (0.1% formic acid in ultra-pure water) at a  
252 flow rate of 0.3 mL/min. The gradient elution was as follows: 0 - 0.5 min, 10% A; 0.5  
253 - 1.2 min, 90% A; 1.2 - 3 min, 10 % A. The injection volume was 10  $\mu$ L, and the  
254 column temperature was maintained at 35  $^{\circ}$ C. Mass spectrometry detection was  
255 carried out with QUATTRO PREMIER XE equipped with an electrospray ionization  
256 source operating in negative ionization mode (ESI-). The capillary voltage was set to  
257 -3,000 V; the cone voltage was set to 10V. The extractor voltage and RF Lens were set  
258 at -3 V and -0.1 V, respectively. The desolvation gas flow was set to 650 L/h at  
259 temperature of 450  $^{\circ}$ C, the cone gas flow rate was set at 50 L/h and the source  
260 temperature was set at 120  $^{\circ}$ C.

261

262 **Determination of  $NAD^+$ / $NADH$  ratio.**

263 The  $NAD^+$ / $NADH$  ratio was measured with the EnzyChrom™  $NAD/NADH$  assay kit  
264 (BioAssay Systems, USA) according to manufacturer's instructions. In brief, 1 mL of

265 bacterial suspension ( $OD_{600} = 0.6$ ) was collected, resuspended in  $NAD^+$  or NADH  
266 extraction buffer, and incubated at  $60\text{ }^{\circ}\text{C}$  for 5 min. The opposite extraction buffer  
267 (NADH extraction buffer was added for detection of  $NAD^+$ ;  $NAD^+$  extraction buffer  
268 was added for detection of NADH) was added to neutralize the extracts. Following  
269 vortex briefly, the neutralized extracts were centrifuged at 14,000 rpm for 5 min.  
270 Supernatants were collected for measurement of  $NAD^+$  and NADH using the  
271 EnzyChrom™ NAD/NADH Assay Kit. Relative amounts of  $NAD^+$  or NADH were  
272 determined by comparing the absorbance of the samples to a standard curve generated  
273 by the cycling assay performed on 0 to  $10\text{ }\mu\text{M}$  of pure  $NAD^+$ . Optical density (OD0)  
274 for time “zero” and OD15 after a 15-min incubation were read at 565 nm (520-600nm)  
275 in room temperature. OD0 was subtracted from OD15 for the standard and sample  
276 wells. The  $\Delta\text{OD}$  values were used to determine sample  $NAD^+$ /NADH concentration  
277 from the standard curve.

278

### 279 **Quantification of intracellular adenosine nucleotides in bacteria.**

280 To extract adenine nucleotides from bacteria, 2 mL of bacterial suspension ( $OD_{600} =$   
281  $0.6$ ) was collected and mixed immediately with  $600\text{ }\mu\text{L}$  hot ethanol. The mixture was  
282 incubated at  $80\text{ }^{\circ}\text{C}$  for 10 min in hot-water bath. After cooling in ice, the volume was  
283 readjusted to 2 mL with cold solution buffer (50 mM tricine, 10 mM  $\text{MgSO}_4$ , and 2  
284 mM EDTA at pH7.8), followed by centrifugation to remove the denatured protein. To  
285 quantify intracellular concentration of ATP, ATP plus ADP and total adenosine  
286 nucleotides,  $40\text{ }\mu\text{L}$  of the cell extract was added to the reaction buffer (75 mM tricine,

287 pH7.5; 5 mM MgCl<sub>2</sub>, and 0.0125 mM KCl), reaction buffer supplemented with 0.5  
288 mM phosphoenolpyruvate (Sigma) and 4 μg of pyruvate kinase (Sigma), and reaction  
289 buffer supplemented with 7.5 U of adenylate (myo) kinase (Sigma), respectively. The  
290 mixtures were incubated at 30 °C for 15 min. ATP was then determined with  
291 luciferin/luciferase using BacTiter-Glo™ Microbial Cell Viability Assay. Adenylate  
292 energy charge (AEC) was calculated as described by  $(ATP + 0.5 \times ADP) / (ATP$   
293  $+ADP + AMP)$ .

294

#### 295 **Membrane potential.**

296 BacLight bacterial membrane potential kit (Invitrogen) was used to measure  
297 membrane potential. In brief, 1 mL of bacterial suspension (OD<sub>600</sub> = 0.6) was  
298 collected and diluted to 10<sup>6</sup> CFU/mL and mixed immediately with 10 μL of 3 mM  
299 DiOC<sub>2</sub>(3) (3, 3'-diethyloxa-carbocyanine iodide). The mixture was incubated with  
300 oscillation at 37 °C for 30 min. Membrane potential was assessed by FACSCalibur  
301 flow cytometer (Becton Dickinson, San Jose, CA, USA). The green fluorescence was  
302 detected through a 488- to 530-nm bandwidth band-pass filter, and the red  
303 fluorescence was detected through a 488- to 610-nm bandwidth band-pass filter. The  
304 membrane potential was determined and normalized as the intensity ratio of the  
305 red/green fluorescence. The membrane potential was calculated with the following

306 formula:  $\text{Log}(10^{3/2} \times (\frac{\text{red fluorescence}}{\text{green fluorescence}}))$ .

307

#### 308 **ELISA assay for intracellular kanamycin and gentamicin.**

309 Bacterial intracellular kanamycin and gentamicin were detected using ELISA rapid  
310 diagnostic kit (Beijing Clover Technology Group Inc. Beijing, China). In brief,  
311 samples were incubated in M9 medium with glutamate or/and an antibiotic for 6 h,  
312 and collected by centrifugation at 8,000g for 5 min. The resulting pellets were washed  
313 three times, re-suspended in sterile saline and adjusted to OD<sub>1.0</sub>. Then 1 mL samples  
314 were sonicated for 5 min and supernatant was for determination of antibiotic content.  
315 Luminescence intensity was taken on a Perkin-Elmer LS55 Fluorescence  
316 Spectrophotometer. The luminescence intensity was cuvette path length (10 mm)  
317 quartz cell with excitation and emission spectra were recorded as 287 and 450 nm,  
318 respectively. Kanamycin and gentamicin working standard solutions were from 0 to 3  
319 ng/mL. The duplicate readings were averaged for each standard and zero standard  
320 optical density 450 nm was subtracted. A standard curve was constructed by plotting  
321 the mean absorbance for each standard on the y-axis against the concentration on the  
322 x-axis, drawing the best fit curve, and then determining sample concentration from the  
323 standard curve.

324

#### 325 **Quantitative reverse-transcription PCR.**

326 Quantitative reverse-transcription PCR (qRT-PCR) was carried out as previously  
327 described (16). Total RNA of each sample was isolated with Trizol (Invitrogen, USA).  
328 The RNA was then quantified spectrophotometrically. The first-strand cDNA was  
329 synthesized using a PrimeScript<sup>TM</sup> RT reagent kit with gDNA eraser (TaKaRa). At  
330 first, 1 µg of RNA extract was mixed with gDNA eraser and buffer at 42 °C for 2 min

331 in total volume of 10  $\mu$ L mixture to remove genomic DNA (gDNA). Then, the  
332 mixture was used to synthesize cDNA according to the manufacturer's instructions.  
333 The reaction was carried out at 37  $^{\circ}$ C for 15 min, 85  $^{\circ}$ C for 5 sec. Real-time PCR was  
334 performed using specific primers in a LightCycle 480 system (Roche, Germany).  
335 Each sample was assayed in triplicate. Primers used for qRT-PCR were shown in **SI**  
336 **Appendix Table S9**. Reactions were performed in the LightCycle 480 system (Roche,  
337 Germany) according to the manufacturer's instructions. 10  $\mu$ L reaction volumes  
338 containing 1  $\mu$ L cDNA diluted with ddH<sub>2</sub>O, 5  $\mu$ L of 2  $\times$  SYBR-Green Master Mix  
339 (TaKaRa), and 400 nM of each primer. The cycling parameters were listed as follows:  
340 95  $^{\circ}$ C for 30 s to activate the polymerase; 40 cycles of 95  $^{\circ}$ C for 10 s; 60  $^{\circ}$ C for 30 s.  
341 Fluorescence measurements were performed at 70  $^{\circ}$ C for 1 s during each cycle.  
342 Cycling was terminated at 95  $^{\circ}$ C with a caefactive velocity of 5  $^{\circ}$ C/s to obtain a  
343 melting curve. To analyze the relative expression level of genes, we converted the  
344 data to percentages relative to the value of control group.

345

#### 346 **Enzyme assays.**

347 Phosphoenolpyruvate carboxykinase / citrate synthase activity was determined using  
348 the enzymatic kit (Suzhou Comin Biotechnology Co., Ltd., Suzhou, China). The  
349 reaction started by the addition of 30  $\mu$ g phosphoenolpyruvate carboxykinase or 50  $\mu$ g  
350 citrate synthase. OAA concentration varied between 0.625 and 320 mM. Substrate  
351 saturation curves were fit to the Michaelis-Menten equation. The Michaelis-Menten  
352 constant ( $K_m$ ) and the maximum velocity of the enzyme ( $V_{max}$ ) were calculated from



353 the direct linear plot of Eisenthal and Cornish-Bowden (17). Isocitrate dehydrogenase  
354 and  $\alpha$ -ketoglutarate dehydrogenase activities were measured using Assay kits  
355 (Genmed Scientifics Inc., USA). In brief, 24-h EIB202 cultures were diluted in M9  
356 medium plus 10 mM acetate to an OD<sub>600</sub> of 0.2 and then incubated in M9 medium  
357 plus 10 mM acetate with an exogenous metabolite at 30 °C for 6 h. Cells were  
358 collected, washed and resuspended in lysate (from the Assay kits), and disrupted by  
359 intermittent sonic oscillation. Following centrifugation, supernatant was transferred to  
360 new tube and used Bradford Assay to detect the protein concentrations. Then samples  
361 were detected by Assay kits.

362

### 363 **Western blot**

364 Western blot was carried out as previously described (18). In brief, Bacterial protein  
365 samples were separated in a 3% stacking gel (pH 6.8) and a 10% separating gel (pH  
366 8.9) in Tris-glycine buffer (pH 8.3) and then transferred onto PVDF membranes for 6  
367 h at 200 mA in transfer buffer (25 mM Tris, 0.1 M glycine and 20% methanol).  
368 Membranes were blocked for 60 min with 5% skimmed milk in TBS (20 mM Tris,  
369 150 mM NaCl, pH 7.4) at 37 °C, then incubated first with primary antibodies for 2 h  
370 at 37 °C, followed by second antibody at 37 °C in TBST (20 mM Tris, 150 mM NaCl,  
371 0.5% Tween-20, pH 7.4) containing 5% skimmed milk on a shaker. Band intensities  
372 were detected by using a gel documentation system, LAS-3000 (Fujifilm Medical  
373 systems, Stamford, USA).

374

375 **Genetic complementation.**

376 Genes *tdcE*, *aceE*, *lpdA*, *pykF*, *pflD* from *E. coli* K12 were amplified by PCR with  
377 primers as shown in **SI Appendix Table S10**. PCR products from *lpdA*, *pykF* and  
378 *pflD* were digested by restriction enzyme *HindIII/BamHI*, and cloned into the  
379 linearized plasmid pACYC184. PCR products from *tdcE* and *aceE* with flanking  
380 sequences which were homogenous with pACYC184 were purified and cloned into  
381 the linearized pACYC184 using ClonExpress™ II One Step Cloning kit (Vazyme  
382 Biotech Co. Ltd., Nanjing, China). Recombinant plasmids were checked by digestion  
383 with restriction endonucleases and electroporated into *E. coli* deletion cells.

384

385 **References**

- 386 1. Peng B, Su YB, Li H, Han Y, Guo C, Tian YM, Peng XX. (2015) Exogenous  
387 alanine or/and glucose plus kanamycin kills antibiotic-resistant bacteria. *Cell*  
388 *Metab* 21:249-261.
- 389 2. Mainguet SE, Gronenberg LS, Wong SS, Liao JC. (2013) A reverse glyoxylate  
390 shunt to build a non-native route from C4 to C2 in *Escherichia coli*. *Metab Eng*  
391 19:116-127.
- 392 3. Grahl N, Demers EG, Lindsay AK, Harty CE, Willger SD, Piispanen AE, Hogan  
393 DA. (2015) Mitochondrial activity and Cyr1 are key regulators of Ras1 activation  
394 of *C. albicans* virulence pathways. *PLoS Pathog* 11:e1005133.
- 395 4. Asanuma N, Hino T. (2001) Molecular characterization, enzyme properties and  
396 transcriptional regulation of phosphoenolpyruvate carboxykinase and pyruvate

- 397 kinase in a ruminal bacterium, *Selenomonas ruminantium*. *Microbiology* 147(Pt  
398 3):681-690.
- 399 5. Lowe PN, Perham RN. (1984) Bromopyruvate as an active-site-directed inhibitor  
400 of the pyruvate dehydrogenase multienzyme complex from *Escherichia coli*.  
401 *Biochemistry* 23:91-97.
- 402 6. Minato Y, Fassio SR, Häse CC. (2013) Malonate inhibits virulence gene  
403 expression in *Vibrio cholerae*. *PLoS One* 8:e63336.
- 404 7. Modig T, Lidén G, Taherzadeh MJ. (2002) Inhibition effects of furfural on alcohol  
405 dehydrogenase, aldehyde dehydrogenase and pyruvate dehydrogenase. *Biochem J*  
406 363(Pt 3):769-776.
- 407 8. Allison KR, Brynildsen MP, Collins JJ. (2011) Metabolite-enabled eradication of  
408 bacterial persisters by aminoglycosides. *Nature* 473:216-220.
- 409 9. Du CC, Yang MJ, Li MY, Yang J, Peng B, Li H, Peng XX. (2017) Metabolic  
410 mechanism for L-Leucine-induced metabolome to eliminate *Streptococcus iniae*. *J*  
411 *Proteome Res* 16:1880-1889.
- 412 10. Zeng ZH, Du CC, Liu SR, Li H, Peng XX, Peng B. (2017) Glucose enhances  
413 tilapia against *Edwardsiella tarda* infection through metabolome reprogramming.  
414 *Fish Shellfish Immunol* 61:34-43.
- 415 11. Hiller K, Metallo CM, Kelleher JK, Stephanopoulos G. (2010) Nontargeted  
416 elucidation of metabolic pathways using stable-isotope tracers and mass  
417 spectrometry. *Anal Chem* 82:6621-6628.
- 418 12. Hiller K, Wegner A, Weindl D, Cordes T, Metallo CM, Kelleher JK,

- 419 Stephanopoulos G. (2013) NTFD - a stand-alone application for the non-targeted  
420 detection of stable isotope-labeled compounds in GC/MS data. *Bioinformatics*  
421 29:1226-1228.
- 422 13. Hiller K, Wegner A, Weindl D, Cordes T, Metallo CM, Kelleher JK,  
423 Stephanopoulos G. (2013) NTFD - a stand-alone application for the non-targeted  
424 detection of stable isotope-labeled compounds in GC/MS data. *Bioinformatics*  
425 29:1226-1228.
- 426 14. Birkler RI, Støttrup NB, Hermansson S, Nielsen TT, Gregersen N, Bøtker HE,  
427 Andreasen MF, Johannsen M. (2010) A UPLC-MS/MS application for profiling  
428 of intermediary energy metabolites in microdialysis samples - a method for  
429 high-throughput. *J Pharm Biomed Anal* 53:983-990.
- 430 15. Rühl M, Rupp B, Nöh K, Wiechert W, Sauer U, Zamboni N. (2012) Collisional  
431 fragmentation of central carbon metabolites in LC-MS/MS increases precision of  
432  $^{13}\text{C}$  metabolic flux analysis. *Biotechnol Bioeng* 109:763-771.
- 433 16. Li WX, Yao ZJ, Sun LN, Hu WJ, Cao JJ, Lin WX, Lin XM. (2016) Proteomics  
434 analysis reveals a potential antibiotic cocktail therapy strategy for *Aeromonas*  
435 *hydrophila* infection in biofilm. *J Proteome Res* 15:1810-1820.
- 436 17. Eisenthal R, Cornish-Bowden A. (1974) The direct linear plot. A new graphical  
437 procedure for estimating enzyme kinetic parameters. *Biochem J* 139:715-720.
- 438 18. Zhang YL, Peng B, Li H, Yan F, Wu HK, Zhao XL, Lin XM, Min SY, Gao YY,  
439 Wang SY, Li YY, Peng XX. (2017) C-terminal domain of hemocyanin, a major  
440 antimicrobial protein from *litopenaeus vannamei*: Structural homology with

441 immunoglobulins and molecular diversity. *Frontiers Immunol* 8:611.

442

443 **Fig. S**  
 444

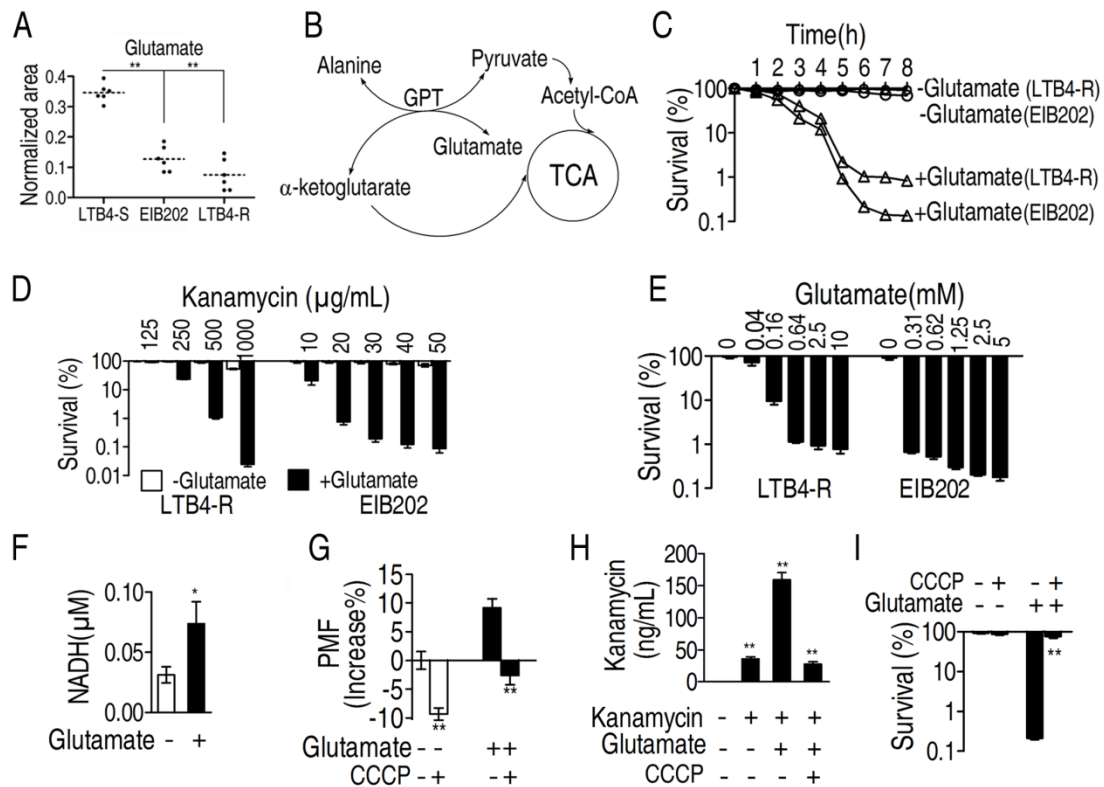

445  
 446  
 447

**Fig. S1**

448 **Fig. S1.** Glutamate restores susceptibility of drug-resistant *E. tarda* to kanamycin. (A)  
 449 Glutamate content in the kanamycin-resistant *E. tarda* by GC-MS detection. Data  
 450 were from Reference (11). (B) Metabolic pathways of alanine and glutamate to the  
 451 TCA cycle. GPT, glutamic-pyruvic transaminase. (C-E) Percent survival of LTB4-R  
 452 and EIB202 with increasing incubation periods (C), or increasing kanamycin (D) or  
 453 increasing glutamate (E). Cells were grown in LB medium and then incubated in M9  
 454 medium plus acetate (10 mM) and glutamate (2.5 mM) and kanamycin (500 µg/mL  
 455 and 30 µg/mL, respectively) for the indicated incubation periods (C), or for the  
 456 indicated kanamycin concentrations for 6 h (D), or for the indicated glutamate  
 457 concentrations for 6 h (E). (F) Intracellular NADH of EIB202, Cells were grown in

458 LB medium and then incubated in M9 medium plus acetate (10 mM) with and without  
459 glutamate (2.5 mM). (G) PMF of EIB202. Cells were grown in LB medium and then  
460 incubated in M9 medium plus acetate (10 mM) with and without glutamate (2.5 mM)  
461 in the presence or absence of CCCP (20  $\mu$ M). (H and I) Intracellular kanamycin (H)  
462 and percent survival (I) of EIB202. Cells were grown in LB medium and then  
463 incubated in M9 medium plus acetate (10 mM) and kanamycin (30  $\mu$ g/mL) with and  
464 without glutamate (2.5 mM) or/and CCCP (20  $\mu$ M). Results (A. C - I) are displayed as  
465 mean  $\pm$ SEM, and three biological repeats were carried out. Significant differences are  
466 identified (\*p < 0.05, \*\*p < 0.01) as determined by Student's t test. p < 0.01 in  
467 Results (C-E).

468

469

470

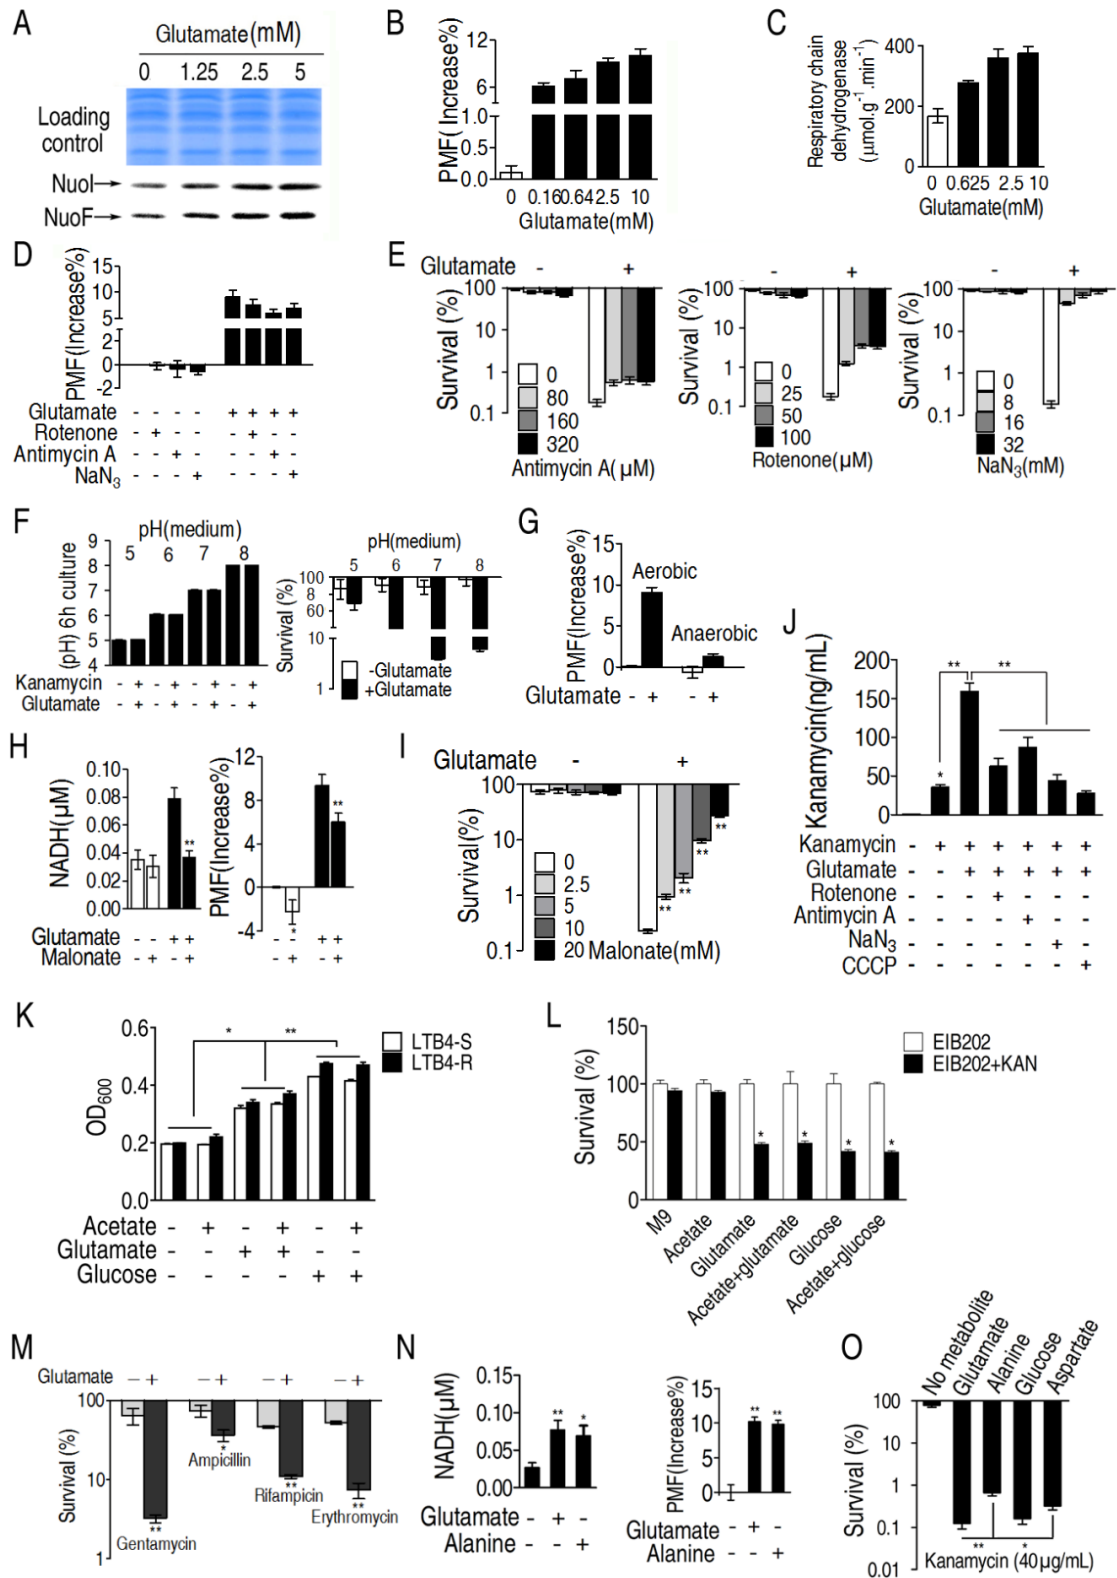

471

472 **Fig. S2.** Glutamate restores susceptibility to kanamycin and regulates NADH, PMF

473 and cellular kanamycin. (A-C) Expression of NuoI and NuoF determined by Western

474 blot (A), PMF (B) and activity of respiratory chain dehydrogenase (C) in EIB202.



475 Cells were grown in LB medium and then incubated in M9 medium plus acetate (10  
476 mM) with and without the indicated concentrations of glutamate. (D) PMF of EIB202.

477 Cells were grown in LB medium and then incubated in M9 medium plus acetate (10  
478 mM) and in the presence or absence of glutamate (2.5 mM) and inhibitor rotenone (50  
479  $\mu\text{M}$ ), antimycin A (80  $\mu\text{M}$ ) or  $\text{NaN}_3$  (16 mM) effect. (E) Percent survival of EIB202.

480 Cells were grown in LB medium and then incubated in M9 medium plus acetate (10  
481 mM) and in the presence or absence of the increasing dosages of rotenone (50  $\mu\text{M}$ ),  
482 antimycin A (80  $\mu\text{M}$ ) or  $\text{NaN}_3$  (16 mM) in the presence of glutamate (2.5 mM) and  
483 kanamycin (30  $\mu\text{g}/\text{mL}$ ). (F) Effect of environment pH on EIB202 growth (without  
484 kanamycin) (left) and percent survival (with 30  $\mu\text{g}/\text{mL}$  kanamycin) (right). Cells were  
485 grown in LB medium and then incubated in M9 medium plus acetate (10 mM) in the  
486 presence or absence of glutamate (2.5 mM). (G) PMF of EIB202. Cells were grown in  
487 LB medium and then incubated in M9 medium plus acetate (10 mM) and in the  
488 presence or absence of glutamate (2.5 mM) under aerobic or anaerobic conditions. (H)  
489 NADH and PMF of EIB202. Cells were grown in LB medium and then incubated in  
490 M9 medium plus acetate (10 mM) in the presence or absence of glutamate (2.5 mM),  
491 and effect of malonate (20 mM). (I) Percent survival of EIB202. Cells were grown in  
492 LB medium and then incubated in M9 medium with acetate (10 mM) in the presence  
493 or absence of glutamate (2.5 mM) and effect of the indicated concentrations of  
494 malonate plus kanamycin (30  $\mu\text{g}/\text{mL}$ ). (J) Effect of glutamate (2.5 mM), rotenone (50  
495  $\mu\text{M}$ ), antimycin A (80  $\mu\text{M}$ ),  $\text{NaN}_3$  (16 mM) and/or CCCP (20  $\mu\text{M}$ ) on intracellular  
496 kanamycin. Cells were grown in LB medium and then incubated in M9 medium with

497 acetate (10 mM) plus kanamycin (30 µg/mL). (K) OD value of LTB4-S and LTB4-R.  
498 Cells were grown in LB medium and then incubated in M9 medium or plus the  
499 indicated metabolites acetate (10 mM), glutamate (2.5 mM), acetate (10 mM) and  
500 glutamate (2.5 mM), glucose (10 mM), or acetate (10 mM) and glucose (10 mM) for 6  
501 h. (L) Percent survival of nongrowing EIB202. Cells were grown in LB medium. The  
502 cultures incubated in M9 medium or plus acetate (10 mM) for 24 h. The resulting  
503 cells were incubated in M9 medium or plus acetate (10 mM), respectively, or the cells  
504 cultured in M9 medium plus acetate (10 mM) were incubated in M9 medium with  
505 glutamate (2.5 mM), or acetate (10 mM) and glutamate (2.5 mM), or glucose (10  
506 mM), or acetate (10 mM) and glucose (10 mM) in the presence or absence of  
507 kanamycin (30 µg/mL). (M) Percent survival of EIB202. Cells were grown in LB  
508 medium and then incubated in M9 medium with acetate (10 mM) in the presence or  
509 absence of glutamate (2.5 mM) plus gentamicin (8 µg/mL), ampicillin (160 µg/mL),  
510 rifampicin (100 µg/mL) or erythromycin (6.4 mg/mL). (N) NADH (left) and PMF  
511 (right) of EIB202. Cells were grown in LB medium and then incubated in M9  
512 medium with acetate (10 mM) in the presence or absence of glutamate (2.5 mM) or  
513 alanine (40 mM). (O) Percent survival of EIB202. Cells were grown in LB medium  
514 and then incubated in M9 with acetate (10 mM) in the presence or absence of  
515 glutamate (2.5mM), alanine (40mM), glucose (10 mM) or aspartate (10 mM) plus  
516 kanamycin (40 µg/mL). Results (B - O) are displayed as mean ± SEM, and three  
517 independent biological repeats were carried out. Significant differences are identified  
518 (\*p < 0.05, \*\*p < 0.01) as determined by Student's t test.

519

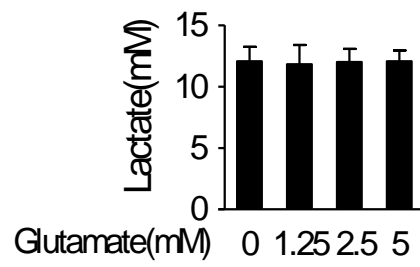

520

521 **Fig. S3.** Lactate measurement. EIB202 cells were grown in LB medium and then  
522 incubated in M9 with acetate (10 mM) in the presence or absence of glutamate (2.5  
523 mM)

524

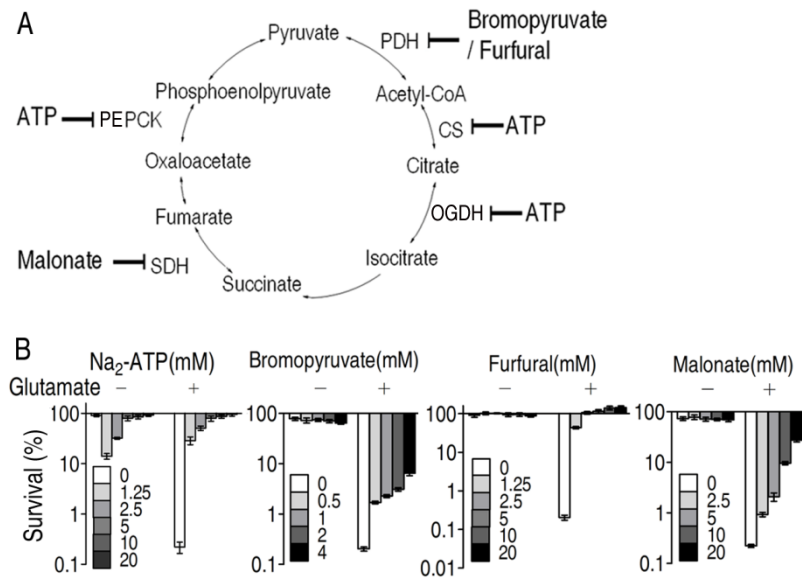

525

526 **Fig. S4. Effect of inhibitors on the P cycle.** (A and B) Two other inhibitors - 1)

527 furfural, a non-competitive inhibitor for PDH (pyruvate dehydrogenase), and - 2)

528 Na<sub>2</sub>-ATP, an inhibitor for PEPCK (phosphoenolpyruvate carboxykinase), CS (citrate

529 synthase), IDH (isocitrate dehydrogenase), and OGDH (α-oxoglutarate

530 dehydrogenase) - were used to further define the role of the three distinguishing steps

531 of the P cycle (A). All of these inhibitors showed strong inhibition of

532 glutamate-triggered killing effects, regardless of which cycle these enzymes belong to,

533 and they did not affect the growth of EIB202. Furfural inhibited glutamate-mediated

534 killing most efficiently while the other compounds inhibited the killing promoted by

535 glutamate (2.5 mM) and kanamycin (30 μg/mL), in a dose-dependent manner (B).

536 Cells were grown in LB medium and then incubated in M9 with acetate (10 mM) in

537 the presence or absence of glutamate (2.5 mM) plus the indicated inhibitors. Results

538 (B) are displayed as mean ± SEM, and three biological repeats were carried out.

539 Significant differences are determined by Student's t test. All are p < 0.01.

540

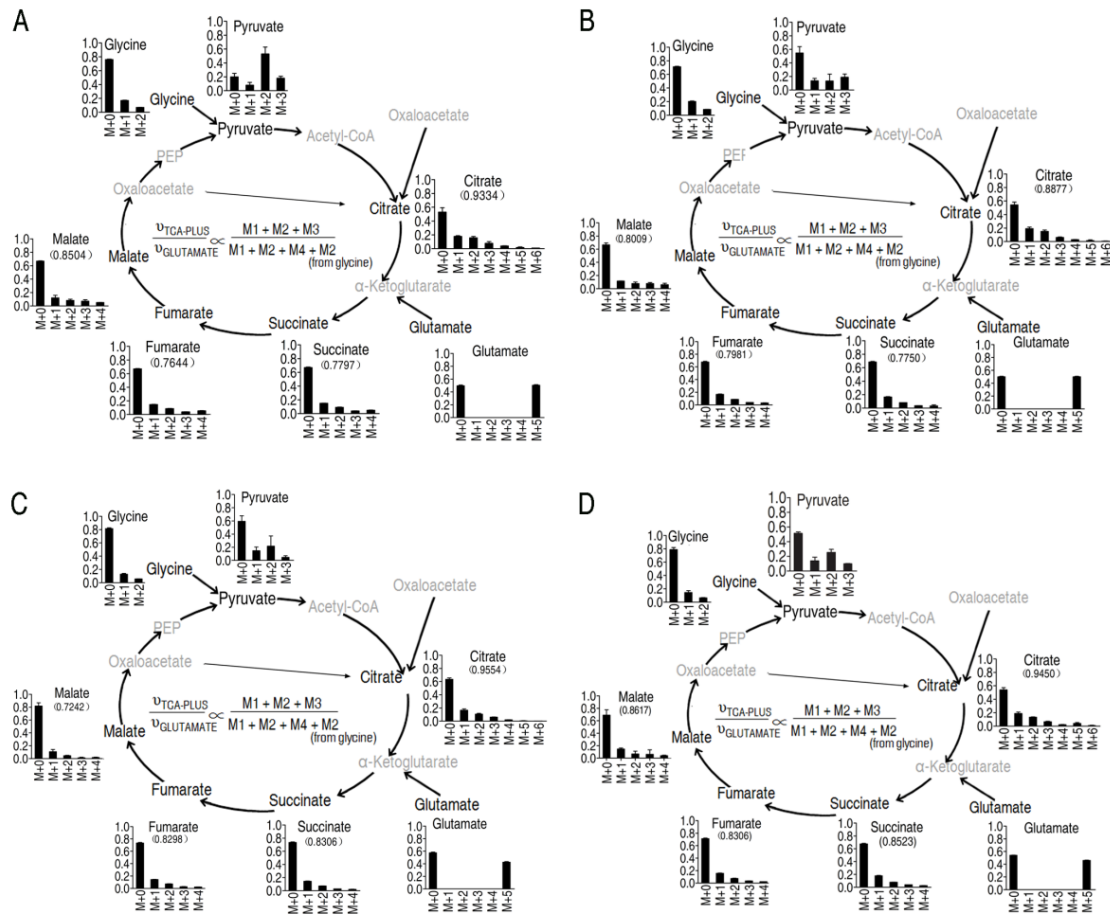

541

542 **Fig. S5.** Mass isotopomer analysis for  $^{13}\text{C}$  labeled glutamate detected in a nontargeted

543 manner in *E. coli* K12 cultured in different culture conditions. (A), Mass isotopomer

544 distributions in the P cycle of *E. coli* K12. Cells were grown M9 medium with acetate

545 (10 mM) plus 0.3% glucose and then incubated in M9 medium with acetate (10 mM)

546 plus  $^{13}\text{C}$  labeled glutamate (1.25 mM) and unlabeled glutamate (1.25 mM) at 6h. (B),

547 Mass isotopomer distributions in the P cycle of *E. coli* K12. Cells were grown in SOC

548 medium and then incubated in M9 medium with acetate (10 mM) plus  $^{13}\text{C}$  labeled

549 glutamate (1.25 mM) and unlabeled glutamate (1.25 mM) at 6h. (C), Mass isotopomer

550 distributions in the P cycle of *E. coli* K12. Cells were cultured in LB medium and then

551 incubated in M9 medium with acetate (10 mM) plus  $^{13}\text{C}$  labeled glutamate (1.25 mM)

552 and unlabeled glutamate (1.25 mM) at 2h. (D), Mass isotopomer distributions in the P

553 cycle of *E. coli* K12. Cells were cultured in LB medium and then incubated in M9  
554 medium with acetate (10 mM) plus <sup>13</sup>C labeled glutamate (1.25 mM) and unlabeled  
555 glutamate (1.25 mM) at 4 h. Each dot shows a biological or technical replicate.

556

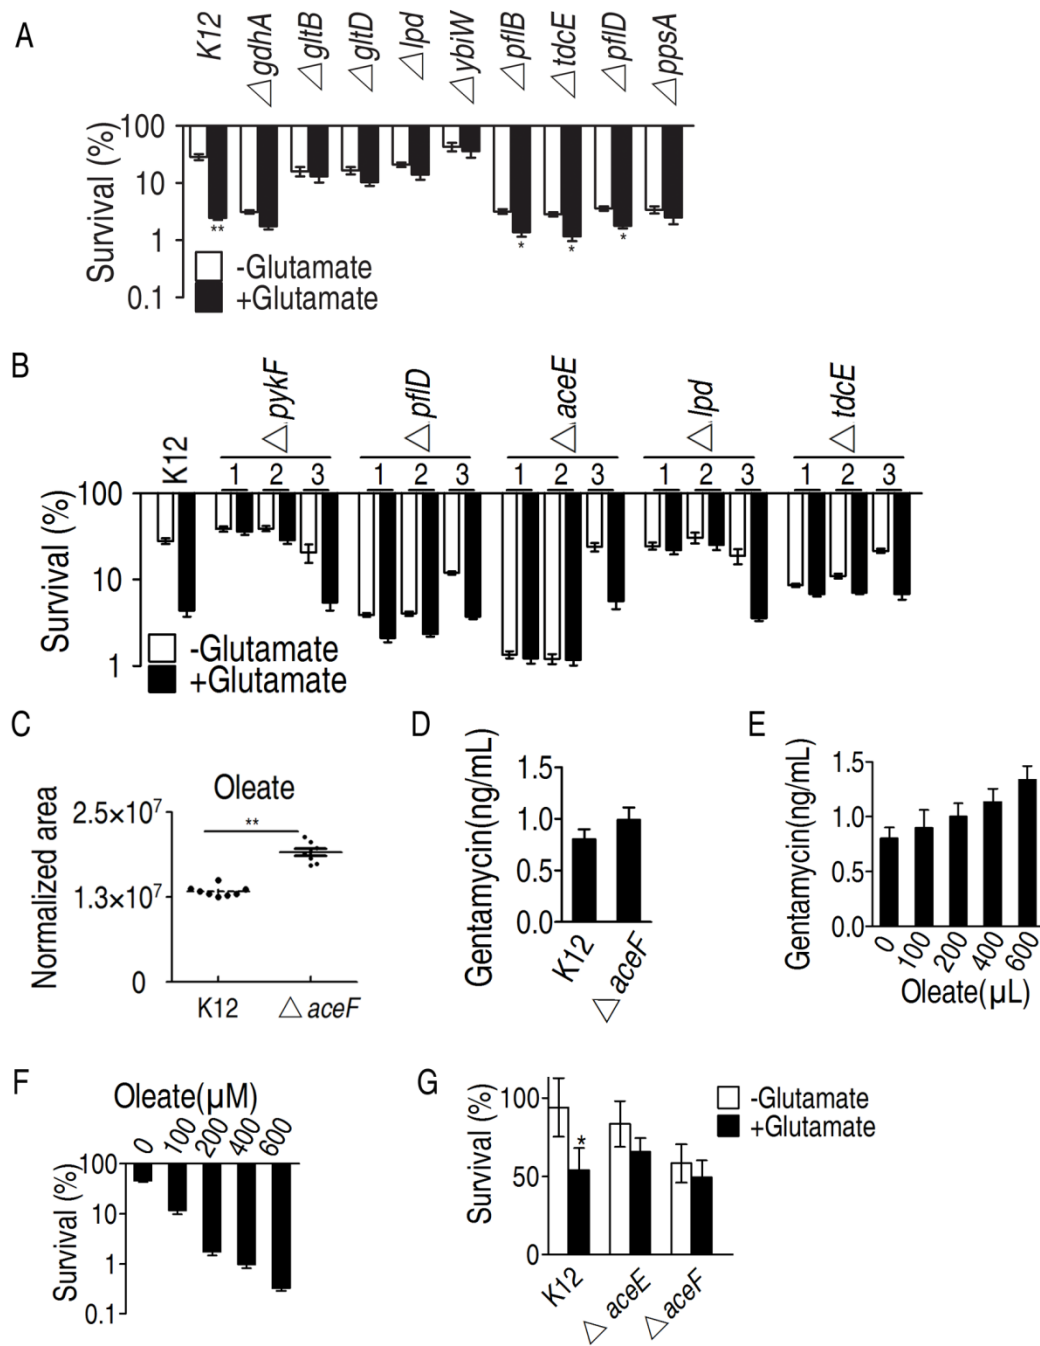

557

558 **Fig. S6.** Percent survival of rescued strains and oleate-enabled killing of *E. coli* K12

559 by gentamicin. (A) Percent survival of *E. coli* K12 and selected P cycle mutants. Cells

560 were grown in LB medium and then incubated in M9 with acetate (10 mM) in the

561 presence or absence of glutamate (2.5 mM) plus gentamicin (1.2  $\mu\text{g}/\text{mL}$ ). (B), Percent

562 survival of rescued strains. 1, Mutant; 2, Plus plasmid pACYC184; 3, Plus plasmid

563 pACYC184 + gene in the presence or absence of glutamate (2.5 mM) plus gentamicin

564 (1.2 µg/mL). (C-F) Oleate-enabled inactivation of *E. coli* K12 by gentamicin. Oleate  
565 level of *E. coli* K12 and  $\Delta aceF$ , which was determined by GC-MS detection. (C)  
566 Intracellular concentration of gentamicin of *E. coli* K12 and  $\Delta aceF$  with the presence  
567 of 1.2 µg/mL gentamicin (D). Intracellular gentamicin concentration in the presence  
568 of the indicated concentration of oleate with the presence of 1.2 µg/mL gentamicin (E).  
569 Percent survival of *E. coli* K12 in the presence of oleate plus gentamicin (0.75 µg/mL)  
570 (F). Cells were grown in LB medium and then incubated in M9 with acetate (10 mM)  
571 plus the indicated oleate or/and gentamicin. (G), Mouse urinary tracts were  
572 catheterized and infected with *E. coli* K12 and its mutants  $\Delta aceE$  and  $\Delta aceF$  with  
573 glutamate (250 mg/kg) and gentamicin (2 mg/kg). Results (A - G) are displayed as  
574 mean  $\pm$  SEM, and three biological repeats were performed. Significant differences are  
575 identified (\*p < 0.05, \*\*p < 0.01; \*\*\*p < 0.01 was detect in *E* and *F*) as determined by  
576 Student's t test.

577

578



579

## Tables S

580

**Table S1.** Summary of all compounds being detected as labeled by the [U-<sup>13</sup>C]

581

labeled L-glutamate in *E. tarda* EIB202, which were cultured in LB medium and then

582

incubated in M9 plus acetate with the labeled glutamate

| RT    | Name                          | Fragments | Pathway                                     |
|-------|-------------------------------|-----------|---------------------------------------------|
| 7.45  | Alanine                       | 3         | Alanine,aspartate and glutamate metabolism  |
| 9.16  | Butanoate                     | 4         | Butanoate metabolism                        |
| 9.56  |                               | 2         |                                             |
| 10.27 | L-Valine                      | 1         | Valine, leucine and isoleucine biosynthesis |
| 11.23 |                               | 3         |                                             |
| 12.86 | Succinate                     | 4         | TCA cycle                                   |
| 13.42 | Uracil                        | 4         | Pyrimidine metabolism                       |
| 13.80 | Fumarate                      | 4         | TCA cycle                                   |
| 14.31 | $\alpha$ -D-Glucopyranoside   | 1         |                                             |
| 14.69 | L-threonine                   | 3         | Glycine, serine and threonine metabolism    |
| 15.01 |                               | 4         |                                             |
| 16.01 | L-Homoserine                  | 3         | Glycine, serine and threonine metabolism    |
| 16.22 |                               | 3         |                                             |
| 17.26 | Malate                        | 3         | TCA cycle                                   |
| 18.03 | L-Proline                     | 6         | Arginine and proline metabolism             |
| 18.29 |                               | 5         |                                             |
| 19.35 | Pentanedioic acid             | 4         | L-Lysine degradation                        |
| 19.83 | 2-Propenoic acid              | 3         | Styrene degradation                         |
| 20.09 |                               | 3         |                                             |
| 20.38 | Glutamate                     | 1         | Alanine,aspartate and glutamate metabolism  |
| 21.38 |                               | 5         |                                             |
| 24.34 |                               | 1         |                                             |
| 24.67 | Citrate                       | 3         | TCA cycle                                   |
| 24.98 | Cadaverine                    | 1         | Glutathione metabolism                      |
| 25.97 | Tyrosine                      | 3         | Tyrosine metabolism                         |
| 26.58 |                               | 5         |                                             |
| 26.93 |                               | 6         |                                             |
| 27.73 |                               | 4         |                                             |
| 29.88 |                               | 5         |                                             |
| 30.18 | Oleic acid                    | 6         | Fatty acid biosynthesis                     |
| 30.45 |                               | 1         |                                             |
| 30.86 | Hexadecanoic acid             | 1         | Fatty acid biosynthesis                     |
| 31.31 | 9,12,15-Octadecatrienoic acid | 2         | Biosynthesis of unsaturated fatty acids     |
| 35.07 |                               | 6         |                                             |
| 35.17 |                               | 2         |                                             |
| 38.54 | Glycine                       | 1         | Glycine, serine and threonine metabolism    |
| 40.22 |                               | 1         |                                             |
| 42.73 |                               | 3         |                                             |

583

584

585

586 **Table S2. Non-targeted detection of [U-<sup>13</sup>C] labeled L-glutamate in *E. tarda***587 **EIB202, which were cultured in LB medium and then incubated in M9 plus**588 **acetate with the labeled glutamate**

| Glutamate( <sup>13</sup> C) |                               |      |                |        |        |        |        |        |        |        |        |        |        |        |        |        |        |
|-----------------------------|-------------------------------|------|----------------|--------|--------|--------|--------|--------|--------|--------|--------|--------|--------|--------|--------|--------|--------|
| RT                          | Name                          | Frag | R <sup>2</sup> | M+0    |        | M+1    |        | M+2    |        | M+3    |        | M+4    |        | M+5    |        | M+6    |        |
|                             |                               |      |                | 100%   | SD     |
| 7.45                        | Alanine                       | 116  | 1              | 0.5797 | 0.0102 | 0.3094 | 0.0080 | 0.0846 | 0.0047 | 0.0279 | 0.0013 |        |        |        |        |        |        |
| 12.86                       | Succinate                     | 247  | 1              | 0.6740 | 0.0118 | 0.1434 | 0.0048 | 0.0791 | 0.0028 | 0.0263 | 0.0039 | 0.0780 | 0.0019 |        |        |        |        |
| 13.8                        | Fumarate                      | 245  | 1              | 0.6773 | 0.0097 | 0.1434 | 0.0051 | 0.0790 | 0.0014 | 0.0280 | 0.0038 | 0.0737 | 0.0012 |        |        |        |        |
| 17.26                       | Malate                        | 233  | 1              | 0.6974 | 0.0081 | 0.1633 | 0.0038 | 0.0647 | 0.0043 | 0.0706 | 0.0053 | 0.0057 | 0.0039 |        |        |        |        |
| 20.38                       | Glutamate                     | 246  | 1              | 0.5285 | 0.0275 | 0.0007 | 0.0007 | 0.0169 | 0.0435 | 0.0104 | 0.0094 | 0.0001 | 0.0127 | 0.4740 | 0.0344 |        |        |
| 24.67                       | Citrate                       | 273  | 1              | 0.5452 | 0.0326 | 0.2163 | 0.0214 | 0.1227 | 0.0246 | 0.0715 | 0.0116 | 0.0113 | 0.0035 | 0.0090 | 0.0026 | 0.0006 | 0.0020 |
| 26.9318                     | Hexadecanoic acid             | 123  | 1              | 0.9410 | 0.0118 | 0.0493 | 0.0048 | 0.0079 | 0.0025 | 0.0020 | 0.0021 | 0.0007 | 0.0011 | 0.0004 | 0.0008 |        |        |
| 30.1785                     | Oleic acid                    | 242  | 1              | 0.4456 | 0.0340 | 0.2193 | 0.0123 | 0.1024 | 0.0192 | 0.0504 | 0.0064 | 0.0942 | 0.0170 | 0.0387 | 0.0029 | 0.0124 | 0.0018 |
| 31.3143                     | 9,12,15-Ocladecatrienoic acid | 57   | 1              | 0.6141 | 0.0661 | 0.2858 | 0.0611 | 0.0374 | 0.0435 | 0.0858 | 0.0382 | 0.0305 | 0.0224 | 0.0048 | 0.0076 |        |        |

589

590

591 **Table S3.** Non-targeted detection of [U-<sup>13</sup>C] labeled L-glutamate in *E. coli* K12  
 592 BW25113, which were cultured in LB medium and then in M9 medium plus acetate  
 593 with the labeled glutamate

| Glutamate( <sup>13</sup> C)<br>RT | Name       | Frao    | R <sup>2</sup> | M+0              |                  | M+1              |                  | M+2              |                  | M+3              |                  | M+4    |        | M+5    |        | M+6    |        |
|-----------------------------------|------------|---------|----------------|------------------|------------------|------------------|------------------|------------------|------------------|------------------|------------------|--------|--------|--------|--------|--------|--------|
|                                   |            |         |                | M+7<br>100%      | SD               | M+8<br>100%      | SD               | M+9<br>100%      | SD               | M+10<br>100%     | SD               | 100%   | SD     | 100%   | SD     | 100%   | SD     |
| 7.85                              | Alanine    | 116     | 1              | 0.8063           | 0.0020           | 0.1382           | 0.0063           | 0.0425           | 0.0033           | 0.0130           | 0.0010           |        |        |        |        |        |        |
| 12.70                             | Isoleucine | 85      | 1              | 0.6008           | 0.0740           | 0.0705           | 0.0166           | 0.1544           | 0.0219           | 0.0328           | 0.0289           | 0.0531 | 0.0267 | 0.0318 | 0.0127 | 0.0566 | 0.0004 |
| 12.83                             | Proline    | 148     | 1              | 0.5753           | 0.0155           | 0.2412           | 0.0270           | 0.1113           | 0.0249           | 0.0158           | 0.0020           | 0.0283 | 0.0235 | 0.0282 | 0.0079 |        |        |
| 13.01                             | Glycine    | 248     | 1              | 0.8935           | 0.0209           | 0.1077           | 0.0252           | 0.0030           | 0.0017           |                  |                  |        |        |        |        |        |        |
| 13.32                             | Succinate  | 172.247 | 1              | 0.7648           | 0.0112           | 0.0704           | 0.0010           | 0.0547           | 0.0137           | 0.0407           | 0.0038           | 0.0439 | 0.0024 |        |        |        |        |
| 13.88                             | Uracil     | 85      | 1              | 0.5977           | 0.0469           | 0.2410           | 0.0334           | 0.1153           | 0.0023           | 0.0264           | 0.0141           | 0.0195 | 0.0029 |        |        |        |        |
| 14.25                             | Fumarate   | 79.245  | 1              | 0.7648           | 0.0112           | 0.0704           | 0.0010           | 0.0547           | 0.0137           | 0.0407           | 0.0038           | 0.0439 | 0.0024 |        |        |        |        |
| 14.93                             | Citrate    | 347     | 1              | 0.6656           | 0.0339           | 0.1617           | 0.0400           | 0.1023           | 0.0305           | 0.0346           | 0.0098           | 0.0208 | 0.0175 | 0.0138 | 0.0045 | 0.0012 | 0.0017 |
| 15.09                             | Threonine  | 160     | 1              | 0.5732           | 0.0048           | 0.2506           | 0.0032           | 0.0409           | 0.0150           | 0.0987           | 0.0335           | 0.0365 | 0.0104 |        |        |        |        |
| 17.68                             | Malate     | 119.233 | 1              | 0.8007           | 0.0720           | 0.0825           | 0.0011           | 0.0534           | 0.0010           | 0.0507           | 0.0023           | 0.0472 | 0.0036 |        |        |        |        |
| 20.80                             | Glutamate  | 246     | 1              | 0.5073           | 0.5220           | 0.0000           | 0.0000           | 0.0000           | 0.0000           | 0.0000           | 0.0000           | 0.0000 | 0.0000 | 0.4927 | 0.4780 |        |        |
| 24.18                             | Glutamine  | 116     | 1              | 0.6288           | 0.0100           | 0.2264           | 0.0143           | 0.0779           | 0.0117           | 0.0369           | 0.0116           | 0.0112 | 0.0073 | 0.0187 | 0.0116 |        |        |
| 27.49                             | Tyrosine   | 280,354 | 1              | 0.5324           | 0.0197           | 0.2401           | 0.0143           | 0.1096           | 0.0010           | 0.0699           | 0.0025           | 0.0279 | 0.0054 | 0.0147 | 0.0032 | 0.0032 | 0.0001 |
| 32.67                             | Oleic acid | 264     | 1              | 0.6475<br>0.0407 | 0.0145<br>0.0229 | 0.0853<br>0.0408 | 0.0033<br>0.0009 | 0.0127<br>0.0154 | 0.0064<br>0.0070 | 0.0366<br>0.0121 | 0.0173<br>0.0127 | 0.0163 | 0.0135 | 0.0410 | 0.0374 | 0.0222 | 0.0078 |

594  
 595  
 596

597 **Table S4.** Non-targeted detection of [U-<sup>13</sup>C] labeled L-glutamate in *E. coli* K12  
 598 BW25113, which were cultured in M9 medium with acetate plus 0.3% glucose and  
 599 then incubated in M9 medium plus acetate with the labeled glutamate

| Glutamate( <sup>13</sup> C) | RT    | Name       | Frac    | R <sup>2</sup> | M+0<br>100% | SD     | M+1<br>100% | SD     | M+2<br>100% | SD     | M+3<br>100%  | SD     | M+4<br>100% | SD     | M+5<br>100% | SD     | M+6<br>100% | SD     |
|-----------------------------|-------|------------|---------|----------------|-------------|--------|-------------|--------|-------------|--------|--------------|--------|-------------|--------|-------------|--------|-------------|--------|
|                             | 7.85  | Alanine    | 116     | 1              | 0.7165      | 0.0062 | 0.1966      | 0.0038 | 0.0690      | 0.0023 | 0.0178       | 0.0002 |             |        |             |        |             |        |
|                             | 12.70 | Isoleucine | 158     | 1              | 0.6011      | 0.0088 | 0.2130      | 0.0016 | 0.0987      | 0.0060 | 0.0601       | 0.0038 | 0.0180      | 0.0015 | 0.0074      | 0.0010 | 0.0017      | 0.0002 |
|                             | 12.83 | Proline    | 148     | 1              | 0.5934      | 0.0034 | 0.1717      | 0.0023 | 0.0752      | 0.0007 | 0.0550       | 0.0018 | 0.0201      | 0.0001 | 0.0846      | 0.0012 |             |        |
|                             | 13.01 | Glycine    | 248     | 1              | 0.7616      | 0.0049 | 0.1697      | 0.0035 | 0.0687      | 0.0014 |              |        |             |        |             |        |             |        |
|                             | 13.32 | Succinate  | 172.247 | 1              | 0.6695      | 0.0077 | 0.1505      | 0.0011 | 0.0910      | 0.0033 | 0.0392       | 0.0012 | 0.0498      | 0.0033 |             |        |             |        |
|                             | 13.88 | Uracil     | 85      | 1              | 0.6225      | 0.0050 | 0.2123      | 0.0052 | 0.1101      | 0.0135 | 0.0246       | 0.0033 | 0.0305      | 0.0061 |             |        |             |        |
|                             | 14.25 | Fumarate   | 79.245  | 1              | 0.6707      | 0.0048 | 0.1479      | 0.0017 | 0.0885      | 0.0023 | 0.0384       | 0.0008 | 0.0545      | 0.0034 |             |        |             |        |
|                             | 14.93 | Citrate    | 347     | 1              | 0.5305      | 0.0627 | 0.1772      | 0.0107 | 0.1568      | 0.0197 | 0.0776       | 0.0250 | 0.0383      | 0.0035 | 0.0161      | 0.0091 | 0.0080      | 0.0013 |
|                             | 15.09 | Threonine  | 160     | 1              | 0.6028      | 0.0241 | 0.1469      | 0.0221 | 0.1092      | 0.0152 | 0.0994       | 0.0421 | 0.0417      | 0.0196 |             |        |             |        |
|                             | 17.68 | Malate     | 119.233 | 1              | 0.6702      | 0.0052 | 0.1219      | 0.0388 | 0.0839      | 0.0190 | 0.0719       | 0.0236 | 0.0521      | 0.0014 |             |        |             |        |
|                             | 20.80 | Glutamate  | 246     | 1              | 0.4964      | 0.0096 | 0.0000      | 0.0000 | 0.0000      | 0.0000 | 0.0000       | 0.0000 | 0.0000      | 0.0000 | 0.5036      | 0.0096 |             |        |
|                             | 24.18 | Glutamine  | 116     | 1              | 0.5612      | 0.0056 | 0.2302      | 0.0050 | 0.1122      | 0.0092 | 0.0472       | 0.0043 | 0.0149      | 0.0043 | 0.0343      | 0.0045 |             |        |
|                             | 27.49 | Tyrosine   | 280.354 | 1              | 0.4891      | 0.0122 | 0.2197      | 0.0031 | 0.1431      | 0.0057 | 0.0887       | 0.0058 | 0.0361      | 0.0028 | 0.0140      | 0.0007 | 0.0056      | 0.0002 |
|                             | 32.67 | Oleic acid | 264     | 1              | 0.3812      | 0.0270 | 0.0747      | 0.0028 | 0.0818      | 0.0094 | 0.0481       | 0.0078 | 0.0528      | 0.0072 | 0.0169      | 0.0033 | 0.0118      | 0.0039 |
|                             |       |            |         |                | 0.0052(M+7) | 0.0003 | 0.0050(M+8) | 0.0014 | 0.0039(M+9) | 0.0039 | 0.0116(M+10) | 0.0046 |             |        |             |        |             |        |

600

601

602 **Table S5.** Non-targeted detection of [U-<sup>13</sup>C] labeled L-glutamate in *E. coli* K12  
 603 BW25113, which were cultured in SOC medium and then incubated in M9 medium  
 604 plus acetate with the labeled glutamate

| Glutamate( <sup>13</sup> C) |            |         |                |             |        |             |        |             |        |             |        |             |        |             |        |             |        |
|-----------------------------|------------|---------|----------------|-------------|--------|-------------|--------|-------------|--------|-------------|--------|-------------|--------|-------------|--------|-------------|--------|
| RT                          | Name       | Frac    | R <sup>2</sup> | M+0<br>100% | SD     | M+1<br>100% | SD     | M+2<br>100% | SD     | M+3<br>100% | SD     | M+4<br>100% | SD     | M+5<br>100% | SD     | M+6<br>100% | SD     |
| 7.85                        | Alanine    | 116     | 1              | 0.7030      | 0.0013 | 0.2036      | 0.0032 | 0.0741      | 0.0009 | 0.0193      | 0.0020 |             |        |             |        |             |        |
| 12.70                       | Isoleucine | 158     | 1              | 0.6845      | 0.0142 | 0.1875      | 0.0077 | 0.0717      | 0.0035 | 0.0385      | 0.0024 | 0.0117      | 0.0009 | 0.0046      | 0.0007 | 0.0015      | 0.0004 |
| 12.83                       | Proline    | 148     | 1              | 0.5826      | 0.0087 | 0.1984      | 0.0018 | 0.0902      | 0.0021 | 0.0555      | 0.0013 | 0.0190      | 0.0007 | 0.0543      | 0.0049 |             |        |
| 13.01                       | Glycine    | 248     | 1              | 0.7132      | 0.0080 | 0.2017      | 0.0066 | 0.0850      | 0.0028 |             |        |             |        |             |        |             |        |
| 13.32                       | Succinate  | 172,247 | 1              | 0.6858      | 0.0082 | 0.1647      | 0.0054 | 0.0811      | 0.0016 | 0.0359      | 0.0009 | 0.0326      | 0.0162 |             |        |             |        |
| 13.88                       | Uracil     | 85      | 1              | 0.6855      | 0.0172 | 0.1753      | 0.0134 | 0.0951      | 0.0103 | 0.0173      | 0.0047 | 0.0269      | 0.0101 |             |        |             |        |
| 14.25                       | Fumarate   | 79,245  | 1              | 0.6781      | 0.0098 | 0.1658      | 0.0072 | 0.0868      | 0.0027 | 0.0383      | 0.0012 | 0.0310      | 0.0023 |             |        |             |        |
| 14.93                       | Citrate    | 347     | 1              | 0.5437      | 0.0402 | 0.1920      | 0.0223 | 0.1512      | 0.0195 | 0.0621      | 0.0070 | 0.0283      | 0.0031 | 0.0154      | 0.0106 | 0.0047      | 0.0035 |
| 15.09                       | Threonine  | 160     | 1              | 0.5954      | 0.0084 | 0.2529      | 0.0144 | 0.0551      | 0.0092 | 0.0719      | 0.0034 | 0.0247      | 0.0003 |             |        |             |        |
| 17.68                       | Malate     | 119,233 | 1              | 0.6664      | 0.0287 | 0.1169      | 0.0012 | 0.0788      | 0.0231 | 0.0775      | 0.0163 | 0.0604      | 0.0207 |             |        |             |        |
| 20.80                       | Glutamate  | 246     | 1              | 0.4996      | 0.0083 | 0.0000      | 0.0000 | 0.0000      | 0.0000 | 0.0000      | 0.0000 | 0.0000      | 0.0000 | 0.5004      | 0.0083 |             |        |
| 27.49                       | Tyrosine   | 280,354 | 1              | 0.5285      | 0.0193 | 0.2112      | 0.0122 | 0.1281      | 0.0052 | 0.0769      | 0.0110 | 0.0350      | 0.0045 | 0.0140      | 0.0040 | 0.0064      | 0.0038 |

605

606

607

608

**Table S6. Non-targeted detection of [U-<sup>13</sup>C] labeled L-glutamate at 2 h in *E.***

609

***coli* K12 BW25113, which were cultured in LB medium and then incubated in**

610

**M9 medium plus acetate with the labeled glutamate**

| Glutamate( <sup>13</sup> C) | RT        | Name    | Frag | R <sup>1</sup> / <sub>2</sub> | M+0<br>100% | SD        | M+1<br>100% | SD       | M+2<br>100% | SD          | M+3<br>100% | SD          | M+4<br>100% | SD     | M+5<br>100% | SD     | M+6<br>100% | SD |
|-----------------------------|-----------|---------|------|-------------------------------|-------------|-----------|-------------|----------|-------------|-------------|-------------|-------------|-------------|--------|-------------|--------|-------------|----|
| 7.85                        | Alanine   | 116     | 1    | 0.7589                        | 0.0068      | 0.1771    | 0.0061      | 0.0484   | 0.0028      | 0.0157      | 0.0023      |             |             |        |             |        |             |    |
| 13.01                       | Glycine   | 248     | 1    | 0.8159                        | 0.0115      | 0.1278    | 0.0127      | 0.0563   | 0.0023      |             |             |             |             |        |             |        |             |    |
| 13.32                       | Succinate | 172,247 | 1    | 0.7350                        | 0.0094      | 0.1445    | 0.0031      | 0.0718   | 0.0030      | 0.0277      | 0.0015      | 0.0211      | 0.0022      |        |             |        |             |    |
| 13.88                       | Uracil    | 85      | 1    | 0.6667                        | 0.0272      | 0.1801    | 0.0236      | 0.0986   | 0.0217      | 0.0179      | 0.0050      | 0.0367      | 0.0157      |        |             |        |             |    |
| 14.25                       | Fumarate  | 79,245  | 1    | 0.7329                        | 0.0101      | 0.1437    | 0.0026      | 0.0733   | 0.0034      | 0.0281      | 0.0020      | 0.0220      | 0.0023      |        |             |        |             |    |
| 14.93                       | Citrate   | 347     | 1    | 0.6360                        | 0.0200      | 0.1660    | 0.0202      | 0.1070   | 0.0114      | 0.0613      | 0.0043      | 0.0206      | 0.0015      | 0.0068 | 0.0020      | 0.0023 | 0.0008      |    |
| 15.09                       | Threonine | 160     | 1    | 0.6522                        | 0.0816      | 0.1246    | 0.0184      | 0.1381   | 0.0764      | 0.0772      | 0.0205      | 0.0080      | 0.0385      |        |             |        |             |    |
| 17.68                       | Malate    | 119,233 | 1    | 0.8195527                     | 0.050317973 | 0.1066674 | 0.034779414 | 0.044477 | 0.005986731 | 0.011781035 | 0.009807    | 0.017521875 | 0.00567547  |        |             |        |             |    |
| 20.80                       | Glutamate | 246     | 1    | 0.5748                        | 0.0109      | 0.0000    | 0.0000      | 0.0000   | 0.0000      | 0.0000      | 0.0000      | 0.0000      | 0.0000      | 0.4252 | 0.0109      |        |             |    |
| 24.18                       | Glutamine | 116     | 1    | 0.4178                        | 0.0609      | 0.1153    | 0.0278      | 0.0644   | 0.0224      | 0.0285      | 0.0179      | 0.0178      | 0.0034      | 0.0260 | 0.0225      |        |             |    |

611

612

613 **Table S7. Non-targeted detection of [U-<sup>13</sup>C] labeled L-glutamate at 4h in *E.***  
 614 ***coli* K12 BW25113, which were cultured in LB medium and then incubated in**  
 615 **M9 medium plus acetate with the labeled glutamate**

| Glutamate( <sup>13</sup> C)<br>RT | Name       | Fraq    | R <sup>2</sup> | M+0<br>100% | SD     | M+1<br>100% | SD     | M+2<br>100% | SD     | M+3<br>100% | SD     | M+4<br>100% | SD     | M+5<br>100% | SD     | M+6<br>100% | SD     |
|-----------------------------------|------------|---------|----------------|-------------|--------|-------------|--------|-------------|--------|-------------|--------|-------------|--------|-------------|--------|-------------|--------|
| 7.85                              | Alanine    | 116     | 1              | 0.7002      | 0.0386 | 0.2173      | 0.0239 | 0.0670      | 0.0083 | 0.0155      | 0.0082 |             |        |             |        |             |        |
| 12.70                             | Isoleucine | 158     | 1              | 0.7798      | 0.0140 | 0.1494      | 0.0111 | 0.0444      | 0.0034 | 0.0177      | 0.0021 | 0.0047      | 0.0006 | 0.0022      | 0.0026 | 0.0018      | 0.0007 |
| 12.83                             | Proline    | 148     | 1              | 0.2645      | 0.0583 | 0.1251      | 0.2976 | 0.2172      | 0.2369 | 0.1333      | 0.0925 | 0.0767      | 0.0503 | 0.1831      | 0.0769 |             |        |
| 13.01                             | Glycine    | 248     | 1              | 0.7896      | 0.0294 | 0.1455      | 0.0271 | 0.0649      | 0.0047 |             |        |             |        |             |        |             |        |
| 13.32                             | Succinate  | 172,247 | 1              | 0.6756      | 0.0087 | 0.1796      | 0.0058 | 0.0798      | 0.0004 | 0.0391      | 0.0013 | 0.0259      | 0.0018 |             |        |             |        |
| 13.88                             | Uracil     | 85      | 1              | 0.6895      | 0.0273 | 0.1671      | 0.0278 | 0.0965      | 0.0067 | 0.0230      | 0.0054 | 0.0239      | 0.0090 |             |        |             |        |
| 14.25                             | Fumarate   | 79,245  | 1              | 0.7115      | 0.0104 | 0.1566      | 0.0048 | 0.0751      | 0.0043 | 0.0338      | 0.0017 | 0.0231      | 0.0001 |             |        |             |        |
| 14.93                             | Citrate    | 347     | 1              | 0.5396      | 0.0324 | 0.1883      | 0.0215 | 0.1340      | 0.0050 | 0.0657      | 0.0076 | 0.0234      | 0.0016 | 0.0404      | 0.0124 | 0.0085      | 0.0062 |
| 15.09                             | Threonine  | 160     | 1              | 0.6131      | 0.0185 | 0.1612      | 0.0408 | 0.0718      | 0.0340 | 0.1319      | 0.0218 | 0.0220      | 0.0182 |             |        |             |        |
| 17.68                             | Malate     | 119,233 | 1              | 0.6889      | 0.0868 | 0.1468      | 0.0154 | 0.0665      | 0.0448 | 0.0594      | 0.0728 | 0.0384      | 0.0092 |             |        |             |        |
| 20.80                             | Glutamate  | 246     | 1              | 0.5400      | 0.0042 | 0.0000      | 0.0000 | 0.0000      | 0.0000 | 0.0000      | 0.0000 | 0.0000      | 0.0000 | 0.4600      | 0.0042 |             |        |
| 24.18                             | Glutamine  | 116     | 1              | 0.6924      | 0.0252 | 0.1688      | 0.0104 | 0.0745      | 0.0052 | 0.0434      | 0.0153 | 0.0127      | 0.0153 | 0.0081      | 0.0048 |             |        |
| 27.49                             | Tyrosine   | 280,354 | 1              | 0.5592      | 0.0264 | 0.1885      | 0.0237 | 0.1218      | 0.0099 | 0.0575      | 0.0009 | 0.0278      | 0.0064 | 0.0180      | 0.0047 | 0.0138      | 0.0125 |

616

617

618 **Table S8. Non-targeted detection of [U-<sup>13</sup>C] labeled L-glucose in *E. coli* K12**  
619 **BW25113, which were cultured in LB medium and then incubated in M9**  
620 **medium plus acetate with the labeled glucose**

621

| Glucose( <sup>13</sup> C)<br>RT | Name       | Frag    | R <sup>2</sup> | M+0<br>100%     | SD     | M+1<br>100%     | SD     | M+2<br>100%     | SD     | M+3<br>100% | SD     | M+4<br>100% | SD     | M+5<br>100% | SD     | M+6<br>100% | SD     |
|---------------------------------|------------|---------|----------------|-----------------|--------|-----------------|--------|-----------------|--------|-------------|--------|-------------|--------|-------------|--------|-------------|--------|
| 7.85                            | Alanine    | 116     | 1              | 0.6672          | 0.0065 | 0.1644          | 0.0024 | 0.1498          | 0.0078 | 0.0186      | 0.0009 |             |        |             |        |             |        |
| 12.70                           | Isoleucine | 158     | 1              | 0.6561          | 0.0044 | 0.1560          | 0.0029 | 0.1201          | 0.0002 | 0.0444      | 0.0010 | 0.0167      | 0.0007 | 0.0057      | 0.0006 | 0.0009      | 0.0000 |
| 12.83                           | Proline    | 148     | 1              | 0.6030          | 0.0173 | 0.1750          | 0.0041 | 0.1133          | 0.0030 | 0.0372      | 0.0015 | 0.0120      | 0.0012 | 0.0595      | 0.0128 |             |        |
| 13.01                           | Glycine    | 248     | 1              | 0.7304          | 0.0111 | 0.2049          | 0.0144 | 0.0647          | 0.0126 |             |        |             |        |             |        |             |        |
| 13.32                           | Succinate  | 172,247 | 1              | 0.4912          | 0.0055 | 0.2346          | 0.0009 | 0.1441          | 0.0011 | 0.0986      | 0.0024 | 0.0314      | 0.0014 |             |        |             |        |
| 13.88                           | Uracil     | 85      | 1              | 0.5534          | 0.0079 | 0.2232          | 0.0023 | 0.1298          | 0.0017 | 0.0719      | 0.0038 | 0.0216      | 0.0022 |             |        |             |        |
| 14.25                           | Fumarate   | 79,245  | 1              | 0.5337          | 0.0068 | 0.2134          | 0.0030 | 0.1315          | 0.0020 | 0.0905      | 0.0027 | 0.0309      | 0.0025 |             |        |             |        |
| 14.93                           | Citrate    | 347     | 1              | 0.4240          | 0.0359 | 0.2237          | 0.0217 | 0.1938          | 0.0128 | 0.0974      | 0.0088 | 0.0356      | 0.0044 | 0.0136      | 0.0006 | 0.0115      | 0.0042 |
| 15.09                           | Threonine  | 160     | 1              | 0.5665          | 0.0150 | 0.2013          | 0.0070 | 0.1444          | 0.0112 | 0.0619      | 0.0031 | 0.0259      | 0.0005 |             |        |             |        |
| 17.68                           | Malate     | 119,233 | 1              | 0.5419          | 0.0133 | 0.2200          | 0.0052 | 0.1467          | 0.0030 | 0.0755      | 0.0057 | 0.0159      | 0.0010 |             |        |             |        |
| 20.80                           | Glutamate  | 246     | 1              | 0.5332          | 0.0021 | 0.1594          | 0.0020 | 0.0661          | 0.0003 | 0.0212      | 0.0002 | 0.0212      | 0.0002 | 0.0043      | 0.0001 |             |        |
| 24.18                           | Glutamine  | 116     | 1              | 0.5036          | 0.0275 | 0.2133          | 0.0140 | 0.1597          | 0.0076 | 0.0735      | 0.0120 | 0.0385      | 0.0120 | 0.0114      | 0.0051 |             |        |
| 27.49                           | Tyrosine   | 280,354 | 1              | 0.3377          | 0.0211 | 0.1497          | 0.0068 | 0.1897          | 0.0089 | 0.1426      | 0.0064 | 0.0896      | 0.0088 | 0.0488      | 0.0059 | 0.0255      | 0.0051 |
|                                 |            |         |                | 0.0098<br>(M+7) | 0.0012 | 0.0053<br>(M+8) | 0.0019 | 0.0013<br>(M+9) | 0.0008 |             |        |             |        |             |        |             |        |

622

623

624

625

626



Table S9 Primers used for QRT-PCR

A: *Escherichia coli*

| Gene        | Primer  | Primer sequence                 | Product size(bp) |
|-------------|---------|---------------------------------|------------------|
| 16SrRNA     | Forward | 5'-ACTGAGACACGGTCCAGACTCCTAC-3' | 146              |
|             | Reverse | 5'-TTAACGTTACACCTTCCTCCCTAC-3'  |                  |
| <i>pck</i>  | Forward | 5'-GATGAACGGAGCCAAATGCA-3'      | 239              |
|             | Reverse | 5'-GGCCAAAGAAGATCGCCAC-3'       |                  |
| <i>pykF</i> | Forward | 5'-TTCACCACCGACCAGAGCG-3'       | 112              |
|             | Reverse | 5'-TCAGGCCATCGTCCACCAG-3'       |                  |
| <i>aceE</i> | Forward | 5'-ACCTCTGGACGCACCACCCT-3'      | 181              |
|             | Reverse | 5'-AGTACACGTTCTCCTGCTTCTCA-3'   |                  |
| <i>aceF</i> | Forward | 5'-CAGGGCGGCTGCTTCACTA-3'       | 141              |
|             | Reverse | 5'-CGCAAACCTTTCCCATTC-3'        |                  |
| <i>gltA</i> | Forward | 5'-TGAGCTGGGTATGAATGACGA-3'     | 127              |
|             | Reverse | 5'-CAGTATGATGCCGGAGTAGAAG-3'    |                  |
| <i>acnB</i> | Forward | 5'-TCCCTGTGCATGGGCAACC-3'       | 194              |
|             | Reverse | 5'-CCCACCTTCGCCATAAACTGC-3'     |                  |
| <i>icd</i>  | Forward | 5'-AAACGCCGAGGATATTTACGC-3'     | 126              |
|             | Reverse | 5'-ATGCCGCAGTGCTCAGGGA-3'       |                  |
| <i>sucA</i> | Forward | 5'-ACCTACTGCGGAACCATCGG-3'      | 119              |
|             | Reverse | 5'-TTCTCCTGCGGGCTAAACG-3'       |                  |
| <i>sucC</i> | Forward | 5'-GCCGAACAGTGGCTGGGTA-3'       | 89               |
|             | Reverse | 5'-GTCGCTCCCTCCACCAGAAT-3'      |                  |
| <i>sdhA</i> | Forward | 5'-ACCCGTTCCCATACCGTTTC-3'      | 80               |
|             | Reverse | 5'-TGCCATTCCCAGTTGTCTTCAT-3'    |                  |
| <i>frdA</i> | Forward | 5'-GCTGTCCGTGGAGCCGTAA-3'       | 81               |
|             | Reverse | 5'-CAAACCAGGTGCGTTCAATCT-3'     |                  |
| <i>fumC</i> | Forward | 5'-GCCGTATGGACTCCTATGTTCG-3'    | 177              |
|             | Reverse | 5'-TCAGGCTCTTGATGCTCTGC-3'      |                  |
| <i>mdh</i>  | Forward | 5'-ATCCGCTCCAACACCTTCG-3'       | 202              |
|             | Reverse | 5'-CGGCCTTAGCCTCTACCACC-3'      |                  |
| <i>aspC</i> | Forward | 5'-GCTGTTCCACGGCTGTTGC-3'       | 128              |
|             | Reverse | 5'-CAAAGCCCTGATAGGCGAAGT-3'     |                  |
| <i>ppc</i>  | Forward | 5'-TCGCCAAGTCCGATCTGTG-3'       | 114              |
|             | Reverse | 5'-CCGCCTGAATATCTCGCTGTA-3'     |                  |
| <i>mgo</i>  | Forward | 5'-AGCGTAATGACGATAACACCT-3'     | 232              |
|             | Reverse | 5'-CCGTAAACCTTCGCCAGA-3'        |                  |
| <i>pykA</i> | Forward | 5'-ACGCCGTTCTGGATGGTA-3'        | 130              |
|             | Reverse | 5'-ACGTTGATGCTCGGGATT-3'        |                  |

**B: *Klebsiella pneumoniae***

| <b>Gene</b>  | <b>Primer</b> | <b>Primer sequence</b>       | <b>Product size(bp)</b> |
|--------------|---------------|------------------------------|-------------------------|
| 16S rRNA     | Forward       | 5'-CCTGGACAAAGACTGACGC-3'    | 104                     |
|              | Reverse       | 5'-GGGCACAACCTCCAAATC-3'     |                         |
| <i>oadA</i>  | Forward       | 5'-CGTGGAGGTGGAAGGCAAAG-3'   | 91                      |
|              | Reverse       | 5'-AGAGGCAGGAGCAGGAGCAG-3'   |                         |
| <i>oadB</i>  | Forward       | 5'-CACGGTGAGTAAGCGGGAGA-3'   | 110                     |
|              | Reverse       | 5'-GGTTGCCGAAGCAGAACATC-3'   |                         |
| <i>oadC</i>  | Forward       | 5'-GGGCTTTGTGCTGGTGTTC-3'    | 187                     |
|              | Reverse       | 5'-AAGACGGCGATGGTGGTGA-3'    |                         |
| <i>mgo</i>   | Forward       | 5'-GCTCAGCACTACCACCACC-3'    | 166                     |
|              | Reverse       | 5'-CAGTTTCCAGTCTTCTTTACGC-3' |                         |
| <i>mgo2</i>  | Forward       | 5'-CGAAGGTCTACGGTCAGGC-3'    | 116                     |
|              | Reverse       | 5'-CGAGAAGGTGGCGAATGGT-3'    |                         |
| <i>mdh</i>   | Forward       | 5'-AACTGTTCCGGCGTTACCAC-3'   | 110                     |
|              | Reverse       | 5'-GGAGTGACCACCAATGACC-3'    |                         |
| <i>pckA</i>  | Forward       | 5'-CCATCCGTCGAAGGTGATT-3'    | 208                     |
|              | Reverse       | 5'-GTACTGGGTCGGGTGAAGC-3'    |                         |
| <i>pckA2</i> | Forward       | 5'-ACTTCGTCGCCTTCAACCT-3'    | 82                      |
|              | Reverse       | 5'-AACATCCCTTTCTTCATCTCG-3'  |                         |

631

**C: *Vibrio parahaemolyticus***

| <b>Gene</b> | <b>Primer</b> | <b>Primer sequence</b>      | <b>Product size(bp)</b> |
|-------------|---------------|-----------------------------|-------------------------|
| 16S rRNA    | Forward       | 5'-GCACAAGCGGTGGAGCAT-3'    | 202                     |
|             | Reverse       | 5'-TCGCTGGCAAACAAGGAT-3'    |                         |
| <i>oadA</i> | Forward       | 5'-CTTACTTATGCGTTGTTCC-3'   | 87                      |
|             | Reverse       | 5'-CAATGTAGGTGCTGGTTC -3'   |                         |
| <i>oadB</i> | Forward       | 5'-AGAAGAGGACATCAACCCAC-3'  | 155                     |
|             | Reverse       | 5'-CGGAGCCAAGTACACCAG-3'    |                         |
| <i>mdh</i>  | Forward       | 5'-GATTGCGGTTGTTTGTCTA-3'   | 83                      |
|             | Reverse       | 5'-GAACTTCAGCAGCGATTGG-3'   |                         |
| <i>pck</i>  | Forward       | 5'-TACCGACTTCACTACCAGGTG-3' | 93                      |
|             | Reverse       | 5'-AGTCTTTCGCTTTGCTTTCC-3'  |                         |

632

633

**Table S10 related to M & M. Primers used for gene complementation**

| <b>Primer</b>  | <b>Sequence(5'-3')</b>                                  |
|----------------|---------------------------------------------------------|
| <i>tdcE-S</i>  | GCTTATCATCGATA <u>AAGCTT</u> ATGAAGGTAGATATTGATAC       |
| <i>tdcE-AS</i> | ATGCGTCCGGCGTAGA <u>GGATCC</u> TTAGAGCGCCTGGGTAAAGG     |
| <i>aceE-S</i>  | GCTTATCATCGA <u>ATAAGCTT</u> ATGTCAGAACGTTTCCCAA        |
| <i>aceE-AS</i> | CACGATGCGTCCGGCGTAGA <u>GGATCC</u> TTACGCCAGACGCGGGTTAA |
| <i>lpdA-S</i>  | CGCA <u>AAGCTT</u> ATGAGTACTGAAATCAAAC                  |
| <i>lpdA-AS</i> | GCG <u>GGATCC</u> TTACTTCTTCTTCGCTTTCG                  |
| <i>pykF-S</i>  | CGCA <u>AAGCTT</u> ATGAAAAAGACCAAATTGT                  |
| <i>pykF-AS</i> | GCG <u>GGATCC</u> TTAGTAGTGCCGCTCGGTAC                  |
| <i>pflD-S</i>  | CGCA <u>AAGCTT</u> ATGACGAATCGTATCTCTCG                 |
| <i>pflD-AS</i> | GCG <u>GGATCC</u> TTACAGCTGATGCGCTGTCC                  |

**Table S11 Primers for PCK complementation**

| Mutation site(s) |         | Primers                                                 |
|------------------|---------|---------------------------------------------------------|
| R65A             | Forward | 5'-accggtgcttcaccaaagataagtatatcgtccgtgacgatacc-3'      |
|                  | Reverse | 5'-ttggtgagcaccggtgaagatcccggatcgcacgg-3'               |
| G209A            | Forward | 5'-tacggcgctgaaatgaagaaaggatgttctc gatgatgaactacctgc-3' |
|                  | Reverse | 5'-tcatttcagcgccgtaccaggtccgccaatcagct-3'               |
| K212A            | Forward | 5'-gaaatggctgctgggatgttctc gatgatgaactacctgctgccgctg-3' |
|                  | Reverse | 5'-catcccagcagccatttcgccgccgtaccaggtgcc-3'              |
| H232A            | Forward | 5'-tctatggcgtgctccccaacgttggtgagaagg-3'                 |
|                  | Reverse | 5'-cggagcacgcataga agcgataccttcagcggcag-3'              |
| S250A            | Forward | 5'-ggccttgccggcaccg gtaaaaccaccttccacc-3'               |
|                  | Reverse | 5'-cggtgcccgaaggcc gaagaacaccgcaacatcgc-3'              |
| T256A            | Forward | 5'-aaaaccgcgtttcca ccgaccgaaacgtcgctg-3'                |
|                  | Reverse | 5'-tggaaagcgcggtttt accggtgccggaaggccga-3'              |
| D268A/D269A      | Forward | 5'-attggcgtgctgaac acggctgggacgatgacggc-3'              |
|                  | Reverse | 5'-gttcagcagcgccaat caggcgacttccgggtcgg-3'              |
| Y286A/K288A      | Forward | 5'-ggctgcgccgagccact atcaagctgtcgaagaagcggacc -3'       |
|                  | Reverse | 5'-agtggctgcggcgagcc gccttcgaagttaaacacgc-3'            |
| E297A            | Forward | 5'-gaagcggcacctgaaa tctacaacgctatccgtcgt-3'             |
|                  | Reverse | 5'-ttcaggtgccgcttc ttcgacagcttgatagttttgcgtacgacc-3'    |
| R333A            | Forward | 5'-aacaccgcggttctt atccgatctacatcgat-3'                 |

|             |         |                                                        |
|-------------|---------|--------------------------------------------------------|
|             | Reverse | 5'-aagaaaccgcggtgtt ctcggttttgaaccatcat-3'             |
| R449A       | Forward | 5'-ggcaaagctatctcg attaaagatacccgccattatcgagccatcct-3' |
|             | Reverse | 5'-cgagatagctttgcc agtgccgttccagccagtgt-3'             |
| I452A/T455A | Forward | 5'-tcggcgaaagatgcgcgc gccattatcgagccatcct-3'           |
|             | Reverse | 5'-gcgcgcacatcttcgcega gatagctttgccagtgccgt-3'         |

638  
639  
640  
641
